# Supplementary material for: Human proteins that interact with RNA/DNA hybrids
Source: Genome Res. 2018 Sep;28(9):1405–14. doi: 10.1101/gr.237362.118 (PMC6120628; doi:10.1101/gr.237362.118)
Supplement: Supplemental Material [file supp_gr.237362.118_Supplemental_Table_S1.xlsx]

## Sheet: both
Table S1. Proteins identified by pulldown using hybrids or dsDNA.
Protein	Description	BAMBI fold(hybrid/dsDNA)	DPP9 fold(hybrid/dsDNA)	Identified by Gromak group?	%disordered_short	%disordered_long	[GS]Y[GS]found?
AARS	Alanine--tRNA ligase, cytoplasmic	Hybrid only	1.16667	-	-	-	-
ABCE1	ATP-binding cassette sub-family E member 1	4.66667	1.5	-	-	-	-
ABCF1	ATP-binding cassette sub-family F member 1	1.93333	1.63636	Y	100	100	N
ABCF2	ATP-binding cassette sub-family F member 2	0.697674	1.63636	-	42.5	55	N
ACADVL	Very long-chain specific acyl-CoA dehydrogenase, mitochondrial	1.25	1	-	50.3	57.3	N
ACAP1	Arf-GAP with coiled-coil, ANK repeat and PH domain-containing protein 1	1	1.33333	-	58.5	80	N
ACAT1	Acetyl-CoA acetyltransferase, mitochondrial	1.83333	6	-	42.6	35.2	N
ACIN1	Apoptotic chromatin condensation inducer in the nucleus	1.66667	0.75	Y	83.6	96.7	N
ACLY	ATP-citrate synthase	3.3	3.58333	-	-	-	-
ACO2	Aconitate hydratase, mitochondrial	5	1.125	-	-	-	-
ACP1	Low molecular weight phosphotyrosine protein phosphatase	1.2	5	-	-	-	-
ACTR3	Actin-related protein 3	2.25	1	-	-	-	-
AGK	Acylglycerol kinase, mitochondrial	6	1	-	-	-	-
AGPS	Alkyldihydroxyacetonephosphate synthase, peroxisomal	1.5	2	-	-	-	-
AHCY	Adenosylhomocysteinase	5.5	1.33333	-	-	-	-
AHNAK	Neuroblast differentiation-associated protein AHNAK	0.389831	1.5625	-	58.8	67.9	N
AHSA1	Activator of 90 kDa heat shock protein ATPase homolog 1	1	0.5	-	33.8	30.1	Y
AIFM1	Apoptosis-inducing factor 1, mitochondrial	0.714286	1.66667	-	-	-	-
AIM1	Absent in melanoma 1 protein	3	2	-	-	-	-
AIMP1	Aminoacyl tRNA synthase complex-interacting multifunctional protein 1;Endothelial monocyte-activating polypeptide 2	0.833333	1.25	-	54	72.7	N
ALDH18A1	Delta-1-pyrroline-5-carboxylate synthase;Glutamate 5-kinase;Gamma-glutamyl phosphate reductase	2.33333	1.33333	-	-	-	-
ALYREF	THO complex subunit 4	1.6875	1.53846	Y	74.6	88.6	N
ANKHD1	Ankyrin repeat and KH domain-containing protein 1	3.1875	6.66667	-	65.7	84.4	N
ANKRD17	Ankyrin repeat domain-containing protein 17	2.57143	4	-	50.6	68.1	Y
ANXA6	Annexin A6;Annexin	0.4375	1.20588	-	-	-	-
AP2A1	AP-2 complex subunit alpha-1	4	Hybrid only	-	31.6	43.9	N
AP2B1	AP-2 complex subunit beta	2.5	2.2	-	-	-	-
AP3B1	AP-3 complex subunit beta-1	11	1	-	-	-	-
AP3D1	AP-3 complex subunit delta-1	3.14286	1	-	56.2	57.6	N
APEX1	DNA-(apurinic or apyrimidinic site) lyase;DNA-(apurinic or apyrimidinic site) lyase, mitochondrial	0.526786	0.643678	-	100	100	N
API5	Apoptosis inhibitor 5	0.478261	1.125	-	-	-	-
APOBEC3C	DNA dC->dU-editing enzyme APOBEC-3C	1.15789	1.26316	Y	47.5	47.5	N
AQR	Intron-binding protein aquarius	3.5	4	-	-	-	-
ARCN1	Coatomer subunit delta	1.125	1	-	-	-	-
ARF4	ADP-ribosylation factor 4	0.555556	1.4	-	-	-	-
ARHGAP17	Rho GTPase-activating protein 17	0.652174	3	-	35.1	41.7	N
ARHGAP4	Rho GTPase-activating protein 4	0.64	1.66667	-	38.3	38.8	N
ARHGEF1	Rho guanine nucleotide exchange factor 1	0.882353	0.666667	-	36.2	33.9	N
ARHGEF2	Rho guanine nucleotide exchange factor 2	7.8	1.5	-	-	-	-
ARID1A	AT-rich interactive domain-containing protein 1A	0.111111	0.4	-	100	100	Y
ARPC2	Actin-related protein 2/3 complex subunit 2	1	2	-	-	-	-
ASCC3	Activating signal cointegrator 1 complex subunit 3	4.9	5.5	-	-	-	-
ATAD3A	ATPase family AAA domain-containing protein 3A;ATPase family AAA domain-containing protein 3B	2.07692	2.25	-	-	-	-
ATP1A1	Sodium/potassium-transporting ATPase subunit alpha-1	0.809524	1.5	-	-	-	-
ATP2A2	Sarcoplasmic/endoplasmic reticulum calcium ATPase 2	3	8	-	-	-	-
ATP5C1	ATP synthase subunit gamma;ATP synthase subunit gamma, mitochondrial	1.4	1.42857	-	-	-	-
ATP5H	ATP synthase subunit d, mitochondrial	2	0.666667	-	-	-	-
ATP5L	ATP synthase subunit g, mitochondrial	2	1.75	-	-	-	-
ATP5O	ATP synthase subunit O, mitochondrial	0.882353	0.857143	-	-	-	-
ATXN2L	Ataxin-2-like protein	1.8125	2.16667	-	84.3	94.8	N
BCLAF1	Bcl-2-associated transcription factor 1	3.3125	2.5	-	89.3	95.1	N
BTK	Tyrosine-protein kinase BTK	0.933333	0.846154	-	-	-	-
BUB3	Mitotic checkpoint protein BUB3	0.904762	1.26667	Y	-	-	-
BUD31	Protein BUD31 homolog	0.352941	1.33333	-	100	100	N
C14orf166	UPF0568 protein C14orf166	2.09091	4.71429	Y	-	-	-
C1QBP	Complement component 1 Q subcomponent-binding protein, mitochondrial	2	1.16667	-	45.2	51.4	N
CACYBP	Calcyclin-binding protein	0.538462	0.1875	-	50	96	N
CAD	CAD protein;Glutamine-dependent carbamoyl-phosphate synthase;Aspartate carbamoyltransferase;Dihydroorotase	2.42857	1.54545	-	49.5	67	Y
CAND1	Cullin-associated NEDD8-dissociated protein 1	0.823529	1.125	-	-	-	-
CANX	Calnexin	1.25	0.882353	-	38.9	50.7	N
CAP1	Adenylyl cyclase-associated protein;Adenylyl cyclase-associated protein 1	0.777778	1.18182	-	77.2	89.7	N
CAPRIN1	Caprin-1	8.16667	9	-	50	74.7	N
CAPZA1	F-actin-capping protein subunit alpha-1	0.192308	0.666667	-	-	-	-
CAPZB	F-actin-capping protein subunit beta	0.478261	0.888889	-	-	-	-
CARM1	Histone-arginine methyltransferase CARM1	2.5	3	-	-	-	-
CCAR1	Cell division cycle and apoptosis regulator protein 1	0.684211	4.66667	-	41.7	55.5	N
CCAR2	Cell cycle and apoptosis regulator protein 2	2.5	2.33333	-	50.7	60.4	N
CCDC47	Coiled-coil domain-containing protein 47	2.5	0.5	-	-	-	-
CCNT1	Cyclin-T1	3	2	-	-	-	-
CCT3	T-complex protein 1 subunit gamma	4	2.08333	Y	-	-	-
CCT4	T-complex protein 1 subunit delta	2.06667	1.6	Y	-	-	-
CCT6A	T-complex protein 1 subunit zeta	3.25	1.1875	Y	-	-	-
CCT7	T-complex protein 1 subunit eta	1.75	1.29412	-	-	-	-
CCT8	T-complex protein 1 subunit theta	1.82353	1.8	Y	-	-	-
CD3EAP	DNA-directed RNA polymerase I subunit RPA34	1.09524	2	-	100	100	N
CDC2	Cyclin-dependent kinase 1	1	2	-	-	-	-
CDC5L	Cell division cycle 5-like protein	3.15789	1.33333	Y	58.1	76.2	N
CDC73	Parafibromin	2.4	1.66667	-	-	-	-
CDKN2AIP	CDKN2A-interacting protein	1	8	-	31.9	51.9	N
CHAF1B	Chromatin assembly factor 1 subunit B	0.611111	1	-	34.5	33.6	N
CHD4	Chromodomain-helicase-DNA-binding protein 4	1.85366	2.4	-	100	100	N
CHERP	Calcium homeostasis endoplasmic reticulum protein	2	5	-	66.5	78.7	Y
CIRBP	Cold-inducible RNA-binding protein	0.928571	3.25	-	-	-	-
CKAP5	Cytoskeleton-associated protein 5	0.370861	0.784314	-	-	-	-
CLASP1	CLIP-associating protein 1	0.285714	0.333333	-	34.5	40.1	Y
CLINT1	Clathrin interactor 1	1.8125	1.64286	-	78.8	77.3	N
CLIP2	CAP-Gly domain-containing linker protein 2	0.571429	2	-	49.7	81.3	N
CLTC	Clathrin heavy chain 1	1.57895	1.79167	Y	-	-	-
CLUH	Clustered mitochondria protein homolog	6	1	-	-	-	-
CMAS	N-acylneuraminate cytidylyltransferase	0.933333	0.5	Y	60.2	68.2	N
COPA	Coatomer subunit alpha;Xenin;Proxenin	2.77419	1.26667	-	-	-	-
COPB1	Coatomer subunit beta	1.21429	1.625	-	-	-	-
COPB2	Coatomer subunit beta	2.38462	1.33333	-	-	-	-
CORO1A	Coronin;Coronin-1A	0.914286	1	Y	-	-	-
CORO1C	Coronin;Coronin-1C	0.888889	1.33333	-	-	-	-
CPSF1	Cleavage and polyadenylation specificity factor subunit 1	1.16667	2.5	-	-	-	-
CPSF7	Cleavage and polyadenylation specificity factor subunit 7	2.33333	2	-	76.5	70.4	N
CRYZ	Quinone oxidoreductase	6	1.75	-	-	-	-
CS	Citrate synthase;Citrate synthase, mitochondrial	5	1.2	-	-	-	-
CSA2	Protein Red	2.4	1	-	-	-	-
CSDA	Y-box-binding protein 3	0.933333	1.28571	-	-	-	-
CSDE1	Cold shock domain-containing protein E1	6.33333	3.66667	-	63	56.5	Y
CSE1L	Exportin-2	2.5	1	-	-	-	-
CSNK2A1	Casein kinase II subunit alpha;Casein kinase II subunit alpha 3	2.66667	3.66667	-	-	-	-
CSNK2A2	Casein kinase II subunit alpha	Hybrid only	3	-	-	-	-
CTPS1	CTP synthase;CTP synthase 1	3.5	2.5	-	-	-	-
CUL3	Cullin-3	0.5	0.75	-	-	-	-
CUL4A	Cullin-4A	0.210526	0.571429	-	33.9	30.5	N
CYFIP2	Cytoplasmic FMR1-interacting protein 2	0.75	1.57143	-	-	-	-
DAP3	28S ribosomal protein S29, mitochondrial	5.5	2.5	-	37	35.4	N
DARS	Aspartate--tRNA ligase, cytoplasmic	0.818182	0.6	Y	-	-	-
DAZAP1	DAZ-associated protein 1	2.14286	2	-	67	68.8	Y
DBP2	Putative pre-mRNA-splicing factor ATP-dependent RNA helicase DHX16	4.2	1.16667	-	-	-	-
DDB1	DNA damage-binding protein 1	0.348624	0.511628	Y	-	-	-
DDB2	DNA damage-binding protein 2	0.322581	0.48	-	53.8	77.4	N
DDOST	Dolichyl-diphosphooligosaccharide--protein glycosyltransferase 48 kDa subunit	0.216667	0.5	-	-	-	-
DDX1	ATP-dependent RNA helicase DDX1	2.08108	7	Y	-	-	-
DDX17	Probable ATP-dependent RNA helicase DDX17	2.92593	3.33333	Y	38	50.3	Y
DDX18	ATP-dependent RNA helicase DDX18	21.75	6	Y	-	-	-
DDX21	Nucleolar RNA helicase 2	5.39286	1.14286	Y	34	38.2	Y
DDX23	Probable ATP-dependent RNA helicase DDX23	2.30769	5	Y	100	100	N
DDX3X	ATP-dependent RNA helicase DDX3X	2.78947	2.2	Y	42.5	48.1	N
DDX41	Probable ATP-dependent RNA helicase DDX41	3	0.875	Y	100	100	N
DDX46	Probable ATP-dependent RNA helicase DDX46	0.37037	1.66667	Y	100	100	N
DDX48	Eukaryotic initiation factor 4A-III;Eukaryotic initiation factor 4A-III, N-terminally processed	4.7	1.16667	-	-	-	-
DDX49	Probable ATP-dependent RNA helicase DDX49	3	Hybrid only	-	-	-	-
DDX5	Probable ATP-dependent RNA helicase DDX5	2.96364	2.04545	Y	-	-	-
DDX58	Probable ATP-dependent RNA helicase DDX58	Hybrid only	Hybrid only	-	-	-	-
DDX6	Probable ATP-dependent RNA helicase DDX6	2.45455	1.7	Y	50.3	62.6	N
DECR1	2,4-dienoyl-CoA reductase, mitochondrial	3.8	1.5	-	-	-	-
DENND3	DENN domain-containing protein 3	1.2	1	-	-	-	-
DHX15	Putative pre-mRNA-splicing factor ATP-dependent RNA helicase DHX15	4.23077	4.375	Y	-	-	-
DHX29	ATP-dependent RNA helicase DHX29	11.6667	3.66667	-	58.8	65	N
DHX30	Putative ATP-dependent RNA helicase DHX30	28.25	18.5	Y	100	100	N
DHX36	ATP-dependent RNA helicase DHX36	1.91667	2.30769	Y	-	-	-
DHX37	Probable ATP-dependent RNA helicase DHX37	Hybrid only	2	-	-	-	-
DHX38	Pre-mRNA-splicing factor ATP-dependent RNA helicase PRP16	2.75	2	-	79	100	N
DHX9	ATP-dependent RNA helicase A	3.47059	1.64516	Y	34.5	38.3	Y
DIAPH1	Protein diaphanous homolog 1	0.8	1.5	-	52.7	60.2	Y
DIMT1	Probable dimethyladenosine transferase	4.66667	Hybrid only	-	-	-	-
DIP2B	Disco-interacting protein 2 homolog B	0.857143	Hybrid only	-	50	48.4	N
DIS3	Exosome complex exonuclease RRP44	1.35294	2.71429	-	-	-	-
DIS3L	DIS3-like exonuclease 1	Hybrid only	Hybrid only	-	65.5	54.5	N
DKC1	H/ACA ribonucleoprotein complex subunit 4	14.6667	3	Y	-	-	-
DKFZp686E1893	Nucleolar protein 9	1.5	1	-	-	-	-
DKFZp686E2459	RNA-binding protein 10	9	6	-	-	-	-
DKFZp686F18120	Transformer-2 protein homolog beta	0.615385	0.8	-	-	-	-
DKFZp686L1159	Ras GTPase-activating protein-binding protein 1	2.1875	2.95238	-	-	-	-
DLST	Dihydrolipoyllysine-residue succinyltransferase component of 2-oxoglutarate dehydrogenase complex, mitochondrial	1	1	-	-	-	-
DNAJA1	DnaJ homolog subfamily A member 1	0.866667	0.461538	-	32.3	30.2	N
DNAJA2	DnaJ homolog subfamily A member 2	1.6	4	-	72.3	89.4	N
DNAJA3	DnaJ homolog subfamily A member 3, mitochondrial	2.4	1.5	Y	-	-	-
DNAJC13	DnaJ homolog subfamily C member 13	1	6	-	-	-	-
DNAJC2	DnaJ homolog subfamily C member 2;DnaJ homolog subfamily C member 2, N-terminally processed	0.944444	6	-	40.7	49.8	N
DNAJC8	DnaJ homolog subfamily C member 8	0.777778	1	-	84.9	94.3	N
DNMT1	Cytosine-specific methyltransferase;DNA (cytosine-5)-methyltransferase 1	0.336207	0.363636	Y	100	100	N
DOCK10	Dedicator of cytokinesis protein 10	0.542857	1.25	-	36.3	33.4	N
DOCK2	Dedicator of cytokinesis protein 2	1.60526	1.15385	-	-	-	-
DOCK8	Dedicator of cytokinesis protein 8	1	1	-	-	-	-
DRG1	Developmentally-regulated GTP-binding protein 1	0.862069	2	-	76.5	92.2	N
DSG1	Desmoglein-1	1.19048	0.448276	-	52	73.3	Y
DSP	Desmoplakin	1.28571	0.352941	-	-	-	-
DYNC1H1	Cytoplasmic dynein 1 heavy chain 1	0.909091	3.83333	-	-	-	-
EEF1A1	Elongation factor 1-alpha;Elongation factor 1-alpha 1;Putative elongation factor 1-alpha-like 3	0.475191	0.831461	Y	-	-	-
EEF1B2	Elongation factor 1-beta	0.419355	0.5	-	-	-	-
EEF1D	Elongation factor 1-delta	0.457627	0.64	-	85.2	100	N
EEF1G	Elongation factor 1-gamma	0.420732	0.62069	Y	-	-	-
EEF2	Elongation factor 2	2.68889	1.31111	Y	45.9	54.1	N
EEFSEC	Selenocysteine-specific elongation factor	0.9	2	-	-	-	-
EHD1	EH domain-containing protein 1	1	2	-	-	-	-
EHD4	EH domain-containing protein 4	0.625	1.11111	-	-	-	-
EIF2A	Eukaryotic translation initiation factor 2A;Eukaryotic translation initiation factor 2A, N-terminally processed	10.5	2.66667	-	42.4	32.2	N
EIF2AK2	Interferon-induced, double-stranded RNA-activated protein kinase	13	6	Y	52.9	61.8	N
EIF2B4	Translation initiation factor eIF-2B subunit delta	2.4	0.333333	-	84.3	91.5	N
EIF2C2	Protein argonaute;Protein argonaute-2	3.4	5.5	-	-	-	-
EIF2D	Eukaryotic translation initiation factor 2D	0.85	2	-	38.1	43	N
EIF2S1	Eukaryotic translation initiation factor 2 subunit 1	0.647059	0.862069	Y	-	-	-
EIF2S2	Eukaryotic translation initiation factor 2 subunit 2	1.12281	0.785714	-	49.5	56.5	N
EIF2S3	Eukaryotic translation initiation factor 2 subunit 3;Putative eukaryotic translation initiation factor 2 subunit 3-like protein	0.727273	0.878788	Y	-	-	-
EIF3A	Eukaryotic translation initiation factor 3 subunit A	2	1.4375	-	48.4	63.1	N
EIF3C	Eukaryotic translation initiation factor 3 subunit C;Eukaryotic translation initiation factor 3 subunit C-like protein	2	1.25	-	61.4	59.1	N
EIF3D	Eukaryotic translation initiation factor 3 subunit D	2.58333	1.3	Y	47.2	49.4	N
EIF3F	Eukaryotic translation initiation factor 3 subunit F	1.33333	1	Y	75	89.5	N
EIF3L	Eukaryotic translation initiation factor 3 subunit L	2.4	1.25	-	-	-	-
EIF3S9	Eukaryotic translation initiation factor 3 subunit B	1.70833	2.83333	-	-	-	-
EIF4A1	Eukaryotic initiation factor 4A-I	1.82353	1.22727	Y	43.5	43.5	N
EIF4G1	Eukaryotic translation initiation factor 4 gamma 1	1.44444	1.25	-	100	100	N
EIF4G2	Eukaryotic translation initiation factor 4 gamma 2	2.53333	1.84615	-	48.2	48.4	N
EIF5A	Eukaryotic translation initiation factor 5A-1	1.26316	1.09091	Y	-	-	-
EIF5B	Eukaryotic translation initiation factor 5B	0.75	1.08824	Y	52.3	58.7	N
EL52	Heat shock protein HSP 90-alpha	1.4375	1.59091	-	-	-	-
ELAVL1	ELAV-like protein 1	1	2	Y	54.9	57.9	N
EMC1	ER membrane protein complex subunit 1	1.46667	1	-	-	-	-
EMD	Emerin	0.666667	0.777778	-	49.8	62.6	N
EMG1	Ribosomal RNA small subunit methyltransferase NEP1	3.66667	1.66667	Y	-	-	-
EML4	Echinoderm microtubule-associated protein-like 4;Tyrosine-protein kinase receptor	0.486486	0.5	-	34.6	41.1	N
ENO1	Alpha-enolase;Enolase	0.36	0.864865	Y	-	-	-
EPRS	Bifunctional glutamate/proline--tRNA ligase;Glutamate--tRNA ligase;Proline--tRNA ligase	1.35484	1	-	-	-	-
EPS8	Epidermal growth factor receptor kinase substrate 8	0.583333	1.5	-	36.5	39	Y
ETF1	Eukaryotic peptide chain release factor subunit 1	0.904762	1.1	-	-	-	-
EWSR1	RNA-binding protein EWS	1.36585	3.83333	-	40.3	87	Y
EXOSC10	Exosome component 10	35	7	-	-	-	-
EXOSC2	Exosome complex component RRP4	9	5	-	-	-	-
EXOSC3	Exosome complex component RRP40	Hybrid only	Hybrid only	-	-	-	-
EXOSC4	Exosome complex component RRP41	Hybrid only	3	-	-	-	-
EXOSC6	Exosome complex component MTR3	Hybrid only	Hybrid only	-	32	41.2	N
EXOSC9	Exosome complex component RRP45	3	Hybrid only	-	-	-	-
EZR	Ezrin;Tyrosine-protein kinase receptor	0.583333	1.11111	Y	44.5	50.5	Y
FAM120A	Constitutive coactivator of PPAR-gamma-like protein 1	2.875	8.5	-	43.1	48.2	N
FAM62A	Extended synaptotagmin-1	1.22222	1.66667	-	-	-	-
FAM98A	Protein FAM98A	2.75	3.8	Y	-	-	-
FAM98B	Protein FAM98B	2.25	26	-	-	-	-
FARSB	Phenylalanine--tRNA ligase beta subunit	0.777778	1.6	-	-	-	-
FARSLA	Phenylalanine--tRNA ligase alpha subunit	1.72222	2.83333	-	-	-	-
FASN	Fatty acid synthase;[Acyl-carrier-protein] S-acetyltransferase;[Acyl-carrier-protein] S-malonyltransferase;3-oxoacyl-[acyl-carrier-protein] synthase;3-oxoacyl-[acyl-carrier-protein] reductase;3-hydroxyacyl-[acyl-carrier-protein] dehydratase;Enoyl-[acyl-carrier-protein] reductase;Oleoyl-[acyl-carrier-protein] hydrolase	2.11111	1.33333	-	100	38.9	N
FBL	rRNA 2-O-methyltransferase fibrillarin	6.5	1.2	Y	51.7	60.7	N
FEN1	Flap endonuclease 1	0.389474	0.551724	-	31.5	39.4	N
FERMT3	Fermitin family homolog 3	0.553191	1.08333	-	59.3	38.3	N
FIP1L1	Pre-mRNA 3-end-processing factor FIP1	1.85714	1.1	Y	75.2	100	N
FKBP3	Peptidyl-prolyl cis-trans isomerase;Peptidyl-prolyl cis-trans isomerase FKBP3	1.13333	1	-	56.9	38.5	N
FLG2	Filaggrin-2	2	0.666667	-	92.7	94.6	Y
FLII	Protein flightless-1 homolog	4.57143	4	-	-	-	-
FLNA	Filamin-A	0.984615	1.36667	-	38.5	56.8	Y
FMNL1	Formin-like protein 1	0.703704	1.17647	-	34	43.1	N
FN1	Fibronectin;Anastellin;Ugl-Y1;Ugl-Y2;Ugl-Y3	1.15385	1.18182	-	49.7	60.7	N
FNBP1	Formin-binding protein 1	0.666667	1.42857	-	50.5	75	N
FRG1	Protein FRG1	1.33333	1.66667	Y	40.5	44.8	Y
FSCN1	Fascin	1	0.857143	-	-	-	-
FUBP1	Far upstream element-binding protein 1	2.11111	4	-	81.7	91.9	Y
FUS	RNA-binding protein FUS	3.08824	3.46154	Y	88.6	99.2	Y
FXR1	Fragile X mental retardation syndrome-related protein 1	8.83333	1.25	Y	-	-	-
G3BP2	Ras GTPase-activating protein-binding protein 2	4.66667	2.375	Y	-	-	-
GARS	Glycine--tRNA ligase	1	0.6	-	-	-	-
GART	Trifunctional purine biosynthetic protein adenosine-3;Phosphoribosylamine--glycine ligase;Phosphoribosylformylglycinamidine cyclo-ligase;Phosphoribosylglycinamide formyltransferase	2	2	-	-	-	-
GEMIN5	Gem-associated protein 5	0.916667	7	-	-	-	-
GFPT1	Glutamine--fructose-6-phosphate aminotransferase [isomerizing] 1	5	1.8	-	-	-	-
GNAI2	Guanine nucleotide-binding protein G(i) subunit alpha-2	1	2	-	72.5	94.4	N
GNB2L1	Guanine nucleotide-binding protein subunit beta-2-like 1;Guanine nucleotide-binding protein subunit beta-2-like 1, N-terminally processed	2.3	1.55556	Y	-	-	-
GNL3	Guanine nucleotide-binding protein-like 3	9.6	2.5	Y	99	100	N
GOLGA2	Golgin subfamily A member 2	2	1.5	-	55.9	77.3	N
GTF2B	Transcription initiation factor IIB	0.875	1	-	31.6	38.5	N
GTF2F1	General transcription factor IIF subunit 1	0.333333	0.3	-	37	43.3	N
GTF2I	General transcription factor II-I	2.33766	0.682927	-	-	-	-
GTPBP4	Nucleolar GTP-binding protein 1	18	0.75	Y	-	-	-
HADHA	Trifunctional enzyme subunit alpha, mitochondrial;Long-chain enoyl-CoA hydratase;Long chain 3-hydroxyacyl-CoA dehydrogenase	1.18519	1.03448	-	-	-	-
HADHB	Trifunctional enzyme subunit beta, mitochondrial;3-ketoacyl-CoA thiolase	1.25	1.30435	-	-	-	-
HARS	Histidine--tRNA ligase, cytoplasmic	0.777778	0.625	-	-	-	-
HBS1L	HBS1-like protein	1.21429	1	-	43.3	50.7	N
HCFC1	Host cell factor 1;HCF N-terminal chain 1;HCF N-terminal chain 2;HCF N-terminal chain 3;HCF N-terminal chain 4;HCF N-terminal chain 5;HCF N-terminal chain 6;HCF C-terminal chain 1;HCF C-terminal chain 2;HCF C-terminal chain 3;HCF C-terminal chain 4;HCF C-terminal chain 5;HCF C-terminal chain 6	0.928571	1.2	-	56.5	74	Y
hCG_19665	Nuclear pore glycoprotein p62	2	0.9	-	-	-	-
hCG_1994130	40S ribosomal protein S15a	4.70588	1.6	-	-	-	-
hCG_2005638	Spliceosome RNA helicase DDX39B	2.6	1.16667	-	-	-	-
hCG_2032701	Dolichyl-diphosphooligosaccharide--protein glycosyltransferase subunit STT3A	2.25	1.75	-	-	-	-
hCG_27698	Probable ATP-dependent RNA helicase DDX47	15.3333	Hybrid only	-	-	-	-
hCG_30204	Acetyl-CoA carboxylase 1;Biotin carboxylase	4.25	2	-	-	-	-
hCG_31253	Far upstream element-binding protein 3	4	11	-	-	-	-
hCG_39985	ATP synthase F(0) complex subunit B1, mitochondrial	1	0.7	-	-	-	-
HDAC1	Histone deacetylase;Histone deacetylase 1	1	0.666667	-	-	-	-
HDAC8	Histone deacetylase 8	0.8	3.57576	-	-	-	-
HDLBP	Vigilin	1.82353	17.6	-	69.4	55.6	N
HEATR1		33	2	Y	-	-	-
HEL113	Vimentin	2.08571	1.04878	-	-	-	-
HEL2	14-3-3 protein epsilon	1	0.75	-	-	-	-
HEL70	Moesin	1.28333	0.85	-	-	-	-
HELLS	Lymphoid-specific helicase	0.857143	1	-	-	-	-
HEL-S-100n	T-complex protein 1 subunit beta	3.63636	1.2	-	-	-	-
HEL-S-102	Heat shock protein beta-1	1.42857	1.14286	-	-	-	-
HEL-S-103		1.17647	3	-	-	-	-
HEL-S-123m	ATP synthase subunit alpha;ATP synthase subunit alpha, mitochondrial	1.34091	1	-	-	-	-
HEL-S-124m	Stress-70 protein, mitochondrial	1.37838	1.16	-	-	-	-
HEL-S-133P	L-lactate dehydrogenase;L-lactate dehydrogenase A chain	0.714286	1.22222	-	-	-	-
HEL-S-15	Cofilin-1	1	1.28571	-	-	-	-
HEL-S-162eP	Glyceraldehyde-3-phosphate dehydrogenase	1.27451	1.38095	-	-	-	-
HEL-S-269	Protein disulfide-isomerase;Protein disulfide-isomerase A3	1.41176	1	-	-	-	-
HEL-S-270	Annexin;Annexin A2;Putative annexin A2-like protein	0.666667	0.944444	-	-	-	-
HEL-S-271	ATP synthase subunit beta;ATP synthase subunit beta, mitochondrial	2.28571	1	-	-	-	-
HEL-S-30	Pyruvate kinase;Pyruvate kinase PKM	0.816327	0.821429	-	-	-	-
HEL-S-37	Plastin-2	0.425	0.79661	-	-	-	-
HEL-S-39	Peptidyl-prolyl cis-trans isomerase;Peptidyl-prolyl cis-trans isomerase B	0.637681	1.16129	-	-	-	-
HEL-S-49	Triosephosphate isomerase	0.571429	1.11111	-	-	-	-
HEL-S-55	Peroxiredoxin-5, mitochondrial	5	2	-	-	-	-
HEL-S-61	Tyrosine-protein kinase receptor;Kinesin-1 heavy chain	1.8	2	-	-	-	-
HEL-S-66p	Inorganic pyrophosphatase	0.666667	1	-	-	-	-
HEL-S-68p	Phosphoglycerate kinase;Phosphoglycerate kinase 1	0.75	0.833333	-	-	-	-
HEL-S-69	T-complex protein 1 subunit epsilon	7	2.6	-	-	-	-
HEL-S-69p	Peptidyl-prolyl cis-trans isomerase;Peptidyl-prolyl cis-trans isomerase A;Peptidyl-prolyl cis-trans isomerase A, N-terminally processed	0.923077	1.25	-	-	-	-
HEL-S-70	Transitional endoplasmic reticulum ATPase	1.25	1.05	-	-	-	-
HEL-S-70p	Bifunctional purine biosynthesis protein PURH;Phosphoribosylaminoimidazolecarboxamide formyltransferase;IMP cyclohydrolase	2.25	1.16667	-	-	-	-
HEL-S-72p	Heat shock cognate 71 kDa protein	0.853659	1.23377	-	-	-	-
HEL-S-77p	Casein kinase I isoform alpha	2.66667	5	-	-	-	-
HEL-S-87p	Fructose-bisphosphate aldolase A	0.5	1.26087	-	-	-	-
HEL-S-89n	78 kDa glucose-regulated protein	0.670886	1.09615	-	-	-	-
HEL-S-94n	Stress-induced-phosphoprotein 1	1.5	0.75	-	-	-	-
HIST1H1B	Histone H1.5	1.47826	0.611111	Y	75.2	100	N
HIST1H2BC	Histone H2B;Histone H2B type 1-L;Histone H2B type 1-M;Histone H2B type 1-N;Histone H2B type 1-H;Histone H2B type 2-F;Histone H2B type 1-C/E/F/G/I;Histone H2B type 1-D;Histone H2B type F-S;Histone H2B type 1-K;Histone H2B type 2-E;Histone H2B type 1-B;Histone H2B type 1-O;Histone H2B type 1-J;Histone H2B type 3-B;Histone H2B type 1-A	1.47619	0.9375	Y	35.7	69.8	Y
HIST1H4H	Histone H4	1.34848	0.65	-	-	-	-
HLA-A	HLA class I histocompatibility antigen, A-31 alpha chain;HLA class I histocompatibility antigen, A-33 alpha chain;HLA class I histocompatibility antigen, A-29 alpha chain	0.769231	1.04545	-	33.4	35.5	N
HLA-DQB1	HLA class II histocompatibility antigen, DQ beta 1 chain	0.428571	1	-	-	-	-
HLA-DRB1		1.125	1.17647	-	-	-	-
HMGB1	High mobility group protein B1;Putative high mobility group protein B1-like 1	0.268041	0.714286	-	63.9	81	N
HMGB2	High mobility group protein B2	0.291667	0.738095	-	77.6	96.3	N
HNRNPA0	Heterogeneous nuclear ribonucleoprotein A0	1.57143	1.5	Y	41.3	58	Y
HNRNPA1	Heterogeneous nuclear ribonucleoprotein A1;Heterogeneous nuclear ribonucleoprotein A1, N-terminally processed;Heterogeneous nuclear ribonucleoprotein A1-like 2	0.990099	1.53061	Y	48.7	57.5	N
HNRNPA2B1	Heterogeneous nuclear ribonucleoproteins A2/B1	0.470968	1.14286	Y	-	-	-
HNRNPA3	Heterogeneous nuclear ribonucleoprotein A3	0.881356	1.3125	Y	83.5	99.1	Y
HNRNPAB	Heterogeneous nuclear ribonucleoprotein A/B	0.740741	1.33333	Y	45.9	57.5	Y
HNRNPC	Heterogeneous nuclear ribonucleoproteins C1/C2	0.689655	0.6	Y	-	-	-
HNRNPDL	Heterogeneous nuclear ribonucleoprotein D-like	0.485714	1.4	-	54.4	50.9	N
HNRNPH1	Heterogeneous nuclear ribonucleoprotein H;Heterogeneous nuclear ribonucleoprotein H, N-terminally processed	2.29032	1.625	Y	-	-	-
HNRNPK	Heterogeneous nuclear ribonucleoprotein K	1.02174	6.44444	Y	44.1	64.6	Y
HNRNPL	Heterogeneous nuclear ribonucleoprotein L	1.13333	3.5625	Y	-	-	-
HNRNPM	Heterogeneous nuclear ribonucleoprotein M	3.7234	1.8	Y	46.6	47.5	N
HNRNPU	Heterogeneous nuclear ribonucleoprotein U	1.04545	0.901961	Y	51.9	61.4	Y
HNRNPUL1	Heterogeneous nuclear ribonucleoprotein U-like protein 1	2.17647	2	Y	37.2	36.7	Y
HNRNPUL2	Heterogeneous nuclear ribonucleoprotein U-like protein 2	0.909091	0.888889	Y	47.1	58.8	Y
HNRPD	Heterogeneous nuclear ribonucleoprotein D0	0.957447	1.40909	-	-	-	-
HNRPF	Heterogeneous nuclear ribonucleoprotein F;Heterogeneous nuclear ribonucleoprotein F, N-terminally processed	5.88889	1.5	-	-	-	-
HRNR	Hornerin	1.45946	0.8	-	96.1	97.2	Y
HSD17B12	Estradiol 17-beta-dehydrogenase 12	2	5	-	-	-	-
HSD17B4	Peroxisomal multifunctional enzyme type 2;(3R)-hydroxyacyl-CoA dehydrogenase;Enoyl-CoA hydratase 2	1.5	2.5	-	-	-	-
HSP90AB1	Heat shock protein HSP 90-beta	1.76786	1.26087	Y	-	-	-
HSPA14	Heat shock 70 kDa protein 14	1.3	1.5	-	-	-	-
HSPD1	60 kDa heat shock protein, mitochondrial	2.17391	1.09259	-	39.4	50.9	N
HSPH1	Heat shock protein 105 kDa	1.36364	1.33333	-	35.2	45.8	N
HUWE1	E3 ubiquitin-protein ligase HUWE1	3	3	-	35	46.4	N
HYOU1	Hypoxia up-regulated protein 1	4	1.54545	-	-	-	-
IARS	Isoleucine--tRNA ligase, cytoplasmic	1.13043	1.33333	-	-	-	-
IDH2	Isocitrate dehydrogenase [NADP];Isocitrate dehydrogenase [NADP], mitochondrial	6	0.666667	-	-	-	-
IFI16	Gamma-interferon-inducible protein 16	0.661765	0.540984	-	-	-	-
IGF2BP1	Insulin-like growth factor 2 mRNA-binding protein 1	5	Hybrid only	Y	-	-	-
IGF2BP3	Insulin-like growth factor 2 mRNA-binding protein 3	2.58333	6.33333	Y	-	-	-
ILF2	Interleukin enhancer-binding factor 2	1.44444	2.63636	Y	-	-	-
ILF3	Interleukin enhancer-binding factor 3	1.98214	3.71429	Y	96.4	100	N
IMMT	MICOS complex subunit MIC60	1.16667	1	-	-	-	-
IMPDH2	Inosine-5-monophosphate dehydrogenase 2	0.466667	0.571429	-	-	-	-
INPP5D	Phosphatidylinositol 3,4,5-trisphosphate 5-phosphatase 1	0.818182	1.5	-	98.5	100	N
IPO9	Importin-9	2	1.5	-	56.8	60	N
IRF4	Interferon regulatory factor 4	0.875	0.307692	-	-	-	-
JTV1	Aminoacyl tRNA synthase complex-interacting multifunctional protein 2	1.33333	1.2	-	-	-	-
JUP	Junction plakoglobin	2.23077	0.4	-	-	-	-
KARS	Lysine--tRNA ligase	0.964286	1.69231	-	43	55.1	N
KHDRBS1	KH domain-containing, RNA-binding, signal transduction-associated protein 1	1.35714	1.6875	-	80	85.9	N
KHSRP	Far upstream element-binding protein 2	1	4.25	-	68.8	83.9	N
KIF22	Kinesin-like protein KIF22	0.305556	0.125	-	31.8	44.5	N
KIF2A	Kinesin-like protein KIF2A	1.26087	0.8	-	100	100	N
KIFC1	Kinesin-like protein KIFC1	0.923077	2.33333	-	35.7	33.8	N
KPNA2	Importin subunit alpha;Importin subunit alpha-1	1.90476	1.375	-	100	100	N
KPNA3	Importin subunit alpha;Importin subunit alpha-4	2.57143	1	-	-	-	-
KPNB1	Importin subunit beta-1	1.47059	1.16667	Y	100	100	N
KPRP	Keratinocyte proline-rich protein	1.11111	Hybrid only	-	35.6	34.4	Y
KTN1	Kinectin	0.666667	0.6	-	42.4	65.7	Y
LARP1	La-related protein 1	3.54545	3	Y	82	93.4	N
LARP4B	La-related protein 4B	2.14286	Hybrid only	-	71.7	92.6	N
LARS	Leucine--tRNA ligase, cytoplasmic	1.21429	1.28571	Y	-	-	-
LBR	Lamin-B receptor	1.83333	1.5	Y	56.8	77.9	N
LETM1	LETM1 and EF-hand domain-containing protein 1, mitochondrial	2.66667	1	-	-	-	-
LIG3	DNA ligase 3;DNA ligase	0.304348	0.4	-	-	-	-
LMNA	Prelamin-A/C;Lamin-A/C	0.556818	0.791667	-	48.7	82.8	N
LMNB1	Lamin-B1	0.636364	0.69697	-	33.1	68.7	N
LMNB2	Lamin-B2	0.511628	0.545455	-	42.9	71	N
LOC115098	Coiled-coil domain-containing protein 124	0.5	0.75	-	-	-	-
LONP1	Lon protease homolog, mitochondrial;Lon protease homolog	1.02941	0.8	-	48.8	52.3	N
LRPPRC	Leucine-rich PPR motif-containing protein, mitochondrial	3.07895	10.1154	-	-	-	-
LRRC47	Leucine-rich repeat-containing protein 47	0.666667	0.733333	-	56	50	N
LRRC59	Leucine-rich repeat-containing protein 59	0.381818	1	-	32.3	43.5	N
LRRFIP1	Leucine-rich repeat flightless-interacting protein 1	15.6667	11	-	91.9	100	N
LSM14A	Protein LSM14 homolog A	0.375	0.666667	-	92.5	91.2	N
LSP1	Lymphocyte-specific protein 1	2.33333	1.75	-	100	100	N
LTV1	Protein LTV1 homolog	Hybrid only	0.857143	-	61.5	83.8	N
LYAR	Cell growth-regulating nucleolar protein	Hybrid only	6	Y	-	-	-
MACF1	Microtubule-actin cross-linking factor 1, isoforms 1/2/3/5	4.45455	0.75	-	30.7	40.3	Y
MAP1S	Microtubule-associated protein 1S;MAP1S heavy chain;MAP1S light chain	0.433333	0.625	-	-	-	-
MAP4	Microtubule-associated protein;Microtubule-associated protein 4	0.43125	0.857143	Y	81.6	99.6	N
MAP4K1	Mitogen-activated protein kinase kinase kinase kinase;Mitogen-activated protein kinase kinase kinase kinase 1	0.44	2	-	45.5	49.5	N
MAPRE1	Microtubule-associated protein RP/EB family member 1	0.5	2	-	35.1	41	N
MARCKS	Myristoylated alanine-rich C-kinase substrate	1	1.16667	-	99.7	99.4	N
MARS	Methionine--tRNA ligase, cytoplasmic	1.75	0.777778	-	-	-	-
MATR3	Matrin-3	2.19231	1.58824	Y	67.3	93.5	N
MBNL1	Muscleblind-like protein 1	2	13	-	-	-	-
MCM2	DNA replication licensing factor MCM2	3.83333	0.833333	-	100	96.9	N
MCM3	DNA replication licensing factor MCM3	1.80769	1.8	Y	42.9	36.4	N
MCM4	DNA replication licensing factor MCM4	1.625	0.666667	-	-	-	-
MCM5	DNA replication licensing factor MCM5	2.23077	2.5	Y	-	-	-
MCM6	DNA replication licensing factor MCM6	2.5	1.28571	-	-	-	-
MCM7	DNA replication licensing factor MCM7	2.875	0.714286	-	30.1	37.7	N
ME2	NAD-dependent malic enzyme, mitochondrial	3.33333	0.833333	-	-	-	-
METAP2	Methionine aminopeptidase 2;Methionine aminopeptidase	4	Hybrid only	-	89.4	98.8	N
MKI67	Antigen KI-67	2.52239	1.25	Y	92.1	97.1	N
MLLT4	Afadin	1.07143	1.66667	-	-	-	-
MNDA	Myeloid cell nuclear differentiation antigen	0.454545	0.217391	-	-	-	-
MORF4L1	Mortality factor 4-like protein 1	1	1.75	-	57.6	80.5	N
MOV10	Putative helicase MOV-10	11.5	5	Y	-	-	-
MPG	DNA-3-methyladenine glycosylase	0.5	0.9	-	45	48.6	N
MRPL12	39S ribosomal protein L12, mitochondrial;Mitochondrial dicarboxylate carrier	1.16667	1	-	-	-	-
MRPS7	28S ribosomal protein S7, mitochondrial	2	9	-	-	-	-
MS4A1	B-lymphocyte antigen CD20	1.2	2.25	-	-	-	-
MSH2	DNA mismatch repair protein Msh2	0.4	0.346154	-	-	-	-
MSH3	DNA mismatch repair protein Msh3	0.291667	0.515152	-	-	-	-
MSH6	DNA mismatch repair protein Msh6	0.586207	1	-	53.9	51.3	N
MTDH	Protein LYRIC	2.06522	1.59091	-	95.5	100	N
MTHFD1	C-1-tetrahydrofolate synthase, cytoplasmic;Methylenetetrahydrofolate dehydrogenase;Methenyltetrahydrofolate cyclohydrolase;Formyltetrahydrofolate synthetase;C-1-tetrahydrofolate synthase, cytoplasmic, N-terminally processed	3.91667	2	-	-	-	-
MTHFD1L	Monofunctional C1-tetrahydrofolate synthase, mitochondrial	12	Hybrid only	-	-	-	-
MX1	Interferon-induced GTP-binding protein Mx1;Interferon-induced GTP-binding protein Mx1, N-terminally processed	1.25	1.42857	-	64	48	N
MYBBP1A	Myb-binding protein 1A	18.5714	3.5	Y	-	-	-
MYH9	Myosin-9	1.46479	1.2	Y	-	-	-
MYL12A	Myosin regulatory light chain 12A;Myosin regulatory light chain 12B;Myosin regulatory light polypeptide 9	1.33333	1.8	-	40.4	60.5	N
MYO1C	Unconventional myosin-Ic	1.05263	0.785714	Y	-	-	-
MYO1E	Unconventional myosin-Ie	1.81818	1.33333	-	-	-	-
MYO1G	Unconventional myosin-Ig;Minor histocompatibility antigen HA-2	1.8	1.76923	-	64.3	83.3	N
MYO5A	Unconventional myosin-Va	Hybrid only	Hybrid only	-	45.9	66.7	N
MYO6	Unconventional myosin-VI	2	4	-	-	-	-
MYO9B	Unconventional myosin-IXb	2.5	1.5	-	33.6	37.2	Y
NAA25	N-alpha-acetyltransferase 25, NatB auxiliary subunit	0.428571	1	-	-	-	-
NAP1L1	Nucleosome assembly protein 1-like 1	4	1	-	-	-	-
NAP1L4	Nucleosome assembly protein 1-like 4	7	1.2	-	53.5	51.5	N
NARS	Asparagine--tRNA ligase, cytoplasmic	0.489362	1.5625	-	65.4	72.8	N
NAT10	N-acetyltransferase 10	8.33333	2.57143	Y	-	-	-
NCAPD2	Condensin complex subunit 1	0.888889	1.66667	-	-	-	-
NCAPG	Condensin complex subunit 3	0.703704	1.8	-	-	-	-
NCAPH	Condensin complex subunit 2	1	0.8	-	48.4	70.3	N
NCF1	Neutrophil cytosol factor 1;Putative neutrophil cytosol factor 1B;Putative neutrophil cytosol factor 1C	0.933333	1.6	-	40.4	36.5	N
NCF2	Neutrophil cytosol factor 2	1	1.4	-	35.7	42.9	N
NCKAP1L	Nck-associated protein 1-like	0.84	1.28571	-	-	-	-
NCL	Nucleolin	6.55814	3.62222	Y	87.4	100	N
NCOA5	Nuclear receptor coactivator 5	0.85	2	Y	48.1	60.6	N
NDUFA9	NADH dehydrogenase [ubiquinone] 1 alpha subcomplex subunit 9, mitochondrial	1.125	0.75	-	-	-	-
NDUFS1	NADH-ubiquinone oxidoreductase 75 kDa subunit, mitochondrial	1.06667	1.25	-	-	-	-
NDUFS2	NADH dehydrogenase [ubiquinone] iron-sulfur protein 2, mitochondrial	1.5	1	-	-	-	-
NDUFS3	NADH dehydrogenase [ubiquinone] iron-sulfur protein 3, mitochondrial	1.28571	0.75	-	-	-	-
NFKB1	Nuclear factor NF-kappa-B p105 subunit;Nuclear factor NF-kappa-B p50 subunit	0.166667	0.125	-	-	-	-
NFKB2	Nuclear factor NF-kappa-B p100 subunit;Nuclear factor NF-kappa-B p52 subunit	1.33333	0.647059	-	75	58.8	N
NIFK	MKI67 FHA domain-interacting nucleolar phosphoprotein	9.5	1.30769	-	-	-	-
NKRF	NF-kappa-B-repressing factor	Hybrid only	Hybrid only	Y	41.8	53	Y
NMT1	Glycylpeptide N-tetradecanoyltransferase;Glycylpeptide N-tetradecanoyltransferase 1	0.911765	2	-	81.9	98.6	N
NOC4L	Nucleolar complex protein 4 homolog	17.6667	4	Y	-	-	-
NOL6	Nucleolar protein 6	20.25	Hybrid only	Y	-	-	-
NONO	Non-POU domain-containing octamer-binding protein	2.40541	3.08	Y	64.8	76.5	N
NOP2	Probable 28S rRNA (cytosine(4447)-C(5))-methyltransferase	10.1	2	Y	100	100	N
NOP56	Nucleolar protein 56	24.25	0.5	Y	-	-	-
NOP58	Nucleolar protein 58	8.77778	1.75	Y	-	-	-
NOSIP	Nitric oxide synthase-interacting protein	0.625	4	-	70.3	79.7	Y
NPM1	Nucleophosmin	14.7188	7.16216	Y	63.1	93.7	N
NPM3	Nucleoplasmin-3	Hybrid only	Hybrid only	Y	36.5	46.6	N
NSUN2	tRNA (cytosine(34)-C(5))-methyltransferase	9.28571	0.823529	-	-	-	-
NSUN5	Probable 28S rRNA (cytosine-C(5))-methyltransferase	7.5	3	-	74.1	89.7	N
NUDC	Nuclear migration protein nudC	0.571429	1.33333	-	100	100	N
NUDT21	Cleavage and polyadenylation specificity factor subunit 5	0.909091	1.5	-	-	-	-
NUFIP2	Nuclear fragile X mental retardation-interacting protein 2	10	4.5	-	100	100	N
NUP133	Nuclear pore complex protein Nup133	2.5	1.25	-	-	-	-
NUP153	Nuclear pore complex protein Nup153	1.20513	2.22222	-	63.4	75.1	Y
NUP155	Nuclear pore complex protein Nup155	1.85714	3	-	-	-	-
NUP160	Nuclear pore complex protein Nup160	2.66667	3	-	-	-	-
NUP205	Nuclear pore complex protein Nup205	1.8	1.5	-	35.2	40.8	N
NUP210	Nuclear pore membrane glycoprotein 210	1.53846	1.28571	-	-	-	-
NUP214	Nuclear pore complex protein Nup214	1.91667	1.66667	-	68.8	86.1	N
NUP54	Nucleoporin p54	1.22222	0.857143	-	-	-	-
NUP93	Nuclear pore complex protein Nup93	2.22222	1	-	-	-	-
NUP98	Nuclear pore complex protein Nup98-Nup96;Nuclear pore complex protein Nup98;Nuclear pore complex protein Nup96	1.92308	1.25	-	-	-	-
NUPL1	Nucleoporin p58/p45	Hybrid only	1	-	-	-	-
OAS3	2-5-oligoadenylate synthase 3	15	4	-	-	-	-
OTUD6B	OTU domain-containing protein 6B	1.125	3	-	81.5	100	N
P4HB	Protein disulfide-isomerase	0.571429	1.36364	-	-	-	-
PA2G4	Proliferation-associated protein 2G4	2.29545	2.28571	Y	-	-	-
PABPC1	Polyadenylate-binding protein 1;Polyadenylate-binding protein 3	2.16667	1.59091	Y	-	-	-
PABPC4	Polyadenylate-binding protein 4	3.75	3	Y	40.6	59.4	N
PAICS	Multifunctional protein ADE2;Phosphoribosylaminoimidazole-succinocarboxamide synthase;Phosphoribosylaminoimidazole carboxylase	0.8	3	-	-	-	-
PARP1	Poly [ADP-ribose] polymerase 1	0.185185	0.176724	Y	38.1	36.8	N
PARP14	Poly [ADP-ribose] polymerase 14	0.777778	1.66667	-	40.7	49.5	N
PC4	Activated RNA polymerase II transcriptional coactivator p15	0.536585	1.41379	-	-	-	-
PCBP1	Poly(rC)-binding protein 1	0.961538	8.83333	Y	-	-	-
PCBP2	Poly(rC)-binding protein 2	0.727273	5.35294	Y	37.5	49.5	N
PCF11	Pre-mRNA cleavage complex 2 protein Pcf11	1.16667	4.66667	-	36.9	38.9	N
PDCD11	Protein RRP5 homolog	40.25	Hybrid only	Y	81.6	63.2	N
PDIA5	Protein disulfide-isomerase A5	0.857143	1.33333	-	-	-	-
PDIA6	Protein disulfide-isomerase A6	5	0.75	-	100	100	N
PDS5A	Sister chromatid cohesion protein PDS5 homolog A	0.595238	0.727273	-	-	-	-
PDS5B	Sister chromatid cohesion protein PDS5 homolog B	1.0625	0.818182	-	89.4	96.4	N
PEG10	Retrotransposon-derived protein PEG10	Hybrid only	5.33333	-	58.9	64.3	N
PFKL	ATP-dependent 6-phosphofructokinase, liver type	4	1.25	-	73.8	61.9	N
PFKP	ATP-dependent 6-phosphofructokinase, platelet type	12	3.4	-	-	-	-
PFN1	Profilin-1	0.833333	0.75	Y	51.5	55.8	N
PGAM5	Serine/threonine-protein phosphatase PGAM5, mitochondrial	0.818182	2	Y	-	-	-
PHB	Prohibitin	0.941176	0.789474	-	-	-	-
PHB2	Prohibitin-2	1.44444	0.952381	-	-	-	-
PHGDH	D-3-phosphoglycerate dehydrogenase	6	1.25	Y	-	-	-
PIP4K2A	Phosphatidylinositol 5-phosphate 4-kinase type-2 alpha	1.2	1.4	-	-	-	-
PIP5K1A	Phosphatidylinositol 4-phosphate 5-kinase type-1 alpha;Putative PIP5K1A and PSMD4-like protein	15	4	-	40.5	40	N
PLCG2	1-phosphatidylinositol 4,5-bisphosphate phosphodiesterase gamma-2;Phosphoinositide phospholipase C	2.2	Hybrid only	-	-	-	-
PLD1	Phospholipase D1	2	1.66667	-	73.7	100	N
PLEC	Plectin	3.33333	2.66667	Y	-	-	-
PLEKHO1	Pleckstrin homology domain-containing family O member 1	0.4	0.222222	-	88.5	100	N
PLRG1	Pleiotropic regulator 1	4.5	1.5	Y	-	-	-
PNKP	Bifunctional polynucleotide phosphatase/kinase;Polynucleotide 3-phosphatase;Polynucleotide 5-hydroxyl-kinase	0.227273	0.444444	-	79.3	97.1	N
PNN	Pinin	11	0.6	-	91.5	98.3	N
PNO1	RNA-binding protein PNO1	3	7.5	-	63.2	63.2	N
PNPT1	Polyribonucleotide nucleotidyltransferase 1, mitochondrial	9.5	Hybrid only	-	-	-	-
POLB	DNA polymerase beta	0.304348	0.210526	-	-	-	-
POLD1	DNA polymerase;DNA polymerase delta catalytic subunit	1.5625	1.42857	-	-	-	-
POLDIP3	Polymerase delta-interacting protein 3	2.33333	1.4	-	43.7	68.6	N
POLR1A	DNA-directed RNA polymerase I subunit RPA1;DNA-directed RNA polymerase	2.85714	4	-	-	-	-
POLR2A	DNA-directed RNA polymerase II subunit RPB1	2.7	3	-	30.4	41.5	N
POLR2B	DNA-directed RNA polymerase;DNA-directed RNA polymerase II subunit RPB2	2.66667	2.5	-	42.1	46.1	N
POM121C	Nuclear envelope pore membrane protein POM 121C;Putative nuclear envelope pore membrane protein POM 121B	1.5	1.5	-	94.4	100	Y
POP1	Ribonucleases P/MRP protein subunit POP1	16.3333	5	Y	84.7	100	N
PPP1CC	Serine/threonine-protein phosphatase;Serine/threonine-protein phosphatase PP1-gamma catalytic subunit	5.5	4	-	-	-	-
PPP1R10	Serine/threonine-protein phosphatase 1 regulatory subunit 10	0.35	0.5	-	71.6	85.1	N
PPP2R1A	Serine/threonine-protein phosphatase 2A 65 kDa regulatory subunit A alpha isoform	1	1.42857	Y	-	-	-
PRDX1	Peroxiredoxin-1	0.869565	1.44444	Y	-	-	-
PRIC295	Translational activator GCN1	2.15385	1.27273	-	-	-	-
PRKDC	DNA-dependent protein kinase catalytic subunit	1.2807	2.4375	Y	-	-	-
PRKRA	Interferon-inducible double-stranded RNA-dependent protein kinase activator A	Hybrid only	Hybrid only	-	37.1	58.1	N
PRMT1	Protein arginine N-methyltransferase 1	1.25	2.66667	-	-	-	-
PRMT5	Protein arginine N-methyltransferase 5;Protein arginine N-methyltransferase 5;Protein arginine N-methyltransferase 5, N-terminally processed	3	Hybrid only	-	-	-	-
PRPF19	Pre-mRNA-processing factor 19	1.42105	0.833333	Y	37.3	46	N
PRPF3	U4/U6 small nuclear ribonucleoprotein Prp3	6.66667	3	Y	60.5	81.5	N
PRPF31	U4/U6 small nuclear ribonucleoprotein Prp31	3	1.66667	-	-	-	-
PRPF4	U4/U6 small nuclear ribonucleoprotein Prp4	7	1.25	Y	-	-	-
PRPF40A	Pre-mRNA-processing factor 40 homolog A	1	1.42857	Y	77.7	98	N
PRPF6	Pre-mRNA-processing factor 6	2.83333	0.5	-	32.6	41.4	N
PRPF8	Pre-mRNA-processing-splicing factor 8	2.64583	2.23077	Y	-	-	-
PRRC2A	Protein PRRC2A	2.14286	1.625	-	91.1	97.3	N
PRRC2C	Protein PRRC2C	1.18182	1.6	-	78.7	92.2	N
PS1TP5BP1	Actin, cytoplasmic 1;Actin, cytoplasmic 1, N-terminally processed	1.27429	1.02479	-	-	-	-
PSIP1	PC4 and SFRS1-interacting protein	0.510204	0.25	Y	100	100	N
PSMC1	26S protease regulatory subunit 4	1.2	1	-	54.8	78.6	N
PSMD2	26S proteasome non-ATPase regulatory subunit 2	2.75	1.2	-	-	-	-
PSMD3	26S proteasome non-ATPase regulatory subunit 3	1.5	1.33333	-	-	-	-
PSMD6	26S proteasome non-ATPase regulatory subunit 6	1.66667	0.333333	-	-	-	-
PSPC1	Paraspeckle component 1	1.57143	5.5	-	72.7	57.6	N
PTBP1	Polypyrimidine tract-binding protein 1	1.77143	11.5556	Y	53.3	54.3	N
PTPN1	Tyrosine-protein phosphatase non-receptor type;Tyrosine-protein phosphatase non-receptor type 1	1.25	0.6	-	34.5	33.4	N
PTPN6	Tyrosine-protein phosphatase non-receptor type;Tyrosine-protein phosphatase non-receptor type 6	0.513889	1.13793	-	62.1	67.2	N
PUF60	Poly(U)-binding-splicing factor PUF60	0.571429	5.2	-	-	-	-
PUM1	Pumilio homolog 1	2.66667	2.33333	-	-	-	-
PWP1	Periodic tryptophan protein 1 homolog	Hybrid only	Hybrid only	Y	-	-	-
PWP2	Periodic tryptophan protein 2 homolog	37	Hybrid only	Y	-	-	-
PYCR1	Pyrroline-5-carboxylate reductase;Pyrroline-5-carboxylate reductase 1, mitochondrial	4	6	-	-	-	-
QARS	Glutamine--tRNA ligase	0.857143	0.473684	-	-	-	-
RAB11A	Ras-related protein Rab-11A;Ras-related protein Rab-11B	2.33333	0.8	-	-	-	-
RAB7A	Ras-related protein Rab-7a	1.6	1.25	Y	-	-	-
RAC2	Ras-related C3 botulinum toxin substrate 2;Ras-related C3 botulinum toxin substrate 1;Ras-related C3 botulinum toxin substrate 3	1	1.33333	Y	-	-	-
RAD50	DNA repair protein RAD50	1.4	0.666667	-	-	-	-
RAE1	mRNA export factor	0.842105	3	-	38.7	42.3	N
RALY	RNA-binding protein Raly	1	1	Y	33.3	59.5	N
RAN	GTP-binding nuclear protein Ran	1.83333	0.833333	-	-	-	-
RANBP2	E3 SUMO-protein ligase RanBP2;RanBP2-like and GRIP domain-containing protein 4;RanBP2-like and GRIP domain-containing protein 3	2.8	Hybrid only	-	-	-	-
RANBP5	Importin-5	1.18182	1.33333	-	-	-	-
RARS	Arginine--tRNA ligase, cytoplasmic	1.0625	0.818182	Y	43.1	34.5	N
RASAL3	RAS protein activator like-3	1.4375	1.33333	-	43.4	48.1	N
RAVER1	Ribonucleoprotein PTB-binding 1	1.73077	1.91667	-	53.3	63.2	Y
RB1	Retinoblastoma-associated protein	0.125	0.166667	-	100	100	N
RBBP4	Histone-binding protein RBBP4	0.791667	0.8	Y	-	-	-
RBBP6	E3 ubiquitin-protein ligase RBBP6	1.83333	3	Y	80.7	89.9	Y
RBM14	RNA-binding protein 14	3.6129	2.45455	Y	-	-	-
RBM15	Putative RNA-binding protein 15	3.71429	2.5	Y	57.1	69.9	Y
RBM25	RNA-binding protein 25	0.607143	3.16667	Y	54.8	84.9	Y
RBM26	RNA-binding protein 26	0.647059	2.33333	-	63.3	84	Y
RBM27	RNA-binding protein 27	1.45455	1.22222	-	73.8	89	N
RBM3	Putative RNA-binding protein 3	1	1.8	-	-	-	-
RBM39	RNA-binding protein 39	0.72973	2	Y	-	-	-
RBM4	RNA-binding protein 4	5.33333	3.5	Y	-	-	-
RBM5	RNA-binding protein 5	7	6	-	82.1	100	N
RBMX	RNA-binding motif protein, X chromosome;RNA-binding motif protein, X chromosome, N-terminally processed;RNA binding motif protein, X-linked-like-1	0.666667	1.68421	Y	32.1	38.5	N
RCC2	Protein RCC2	0.628571	0.833333	Y	33.5	36.8	Y
RECQL	ATP-dependent DNA helicase Q1	0.37931	0.606557	-	-	-	-
RFC1	Replication factor C subunit 1	0.789474	0.333333	-	97	97	N
RFC3	Replication factor C subunit 3	1	1	-	-	-	-
RFC4	Replication factor C subunit 4	0.666667	1	-	49.5	50.5	N
RFC5	Replication factor C subunit 5	1.5	0.666667	-	-	-	-
RFTN1	Raftlin	0.52381	0.333333	-	-	-	-
RNASEH1	Ribonuclease H1	5	13	-	-	-	-
RNASEH2A	Ribonuclease H2 subunit A;Ribonuclease	1.1	6.33333	-	-	-	-
RNASEH2B	Ribonuclease H2 subunit B	2	2.33333	-	38.1	32.1	N
RNASEH2C	Ribonuclease H2 subunit C	1.22222	Hybrid only	-	45	65.9	N
RNF213	E3 ubiquitin-protein ligase RNF213	12.75	13	-	-	-	-
ROD1	Polypyrimidine tract-binding protein 3	4	Hybrid only	-	-	-	-
RPA1	Replication protein A 70 kDa DNA-binding subunit;Replication protein A 70 kDa DNA-binding subunit, N-terminally processed	0.473684	3.08696	-	-	-	-
RPA2	Replication protein A 32 kDa subunit	0.444444	16	-	36.9	53.3	N
RPL10A	60S ribosomal protein L10a;Ribosomal protein	9.6	1.2	-	-	-	-
RPL11	60S ribosomal protein L11	4.375	1.125	-	-	-	-
RPL12	60S ribosomal protein L12	7	2	-	35.6	40.2	N
RPL13	60S ribosomal protein L13	4.3	1.33333	-	-	-	-
RPL13A	60S ribosomal protein L13a;Putative 60S ribosomal protein L13a protein RPL13AP3	21	1.4	-	-	-	-
RPL15	Ribosomal protein L15;60S ribosomal protein L15	8.875	1	-	43.4	34.9	N
RPL17	60S ribosomal protein L17	7.85714	1.5	-	37.7	52.9	N
RPL23	60S ribosomal protein L23	1.84211	1	-	100	100	N
RPL23A	60S ribosomal protein L23a	3	2	-	-	-	-
RPL24	60S ribosomal protein L24	3.36364	1.6	-	57	55.4	N
RPL26	60S ribosomal protein L26-like 1;60S ribosomal protein L26	3.18182	3.33333	-	-	-	-
RPL27	60S ribosomal protein L27	4.16667	1.1	-	-	-	-
RPL3	60S ribosomal protein L3	15.625	2.4	-	-	-	-
RPL30	60S ribosomal protein L30	6.11111	1.18182	-	-	-	-
RPL38	60S ribosomal protein L38	1.52174	1	-	-	-	-
RPL4	60S ribosomal protein L4	16.5714	1.41667	-	39.9	44.1	N
RPL5	60S ribosomal protein L5	29.5	1.5	-	-	-	-
RPL6	60S ribosomal protein L6	8.75	0.8	-	87.5	93.1	N
RPL7	60S ribosomal protein L7	8.88889	1.55556	-	-	-	-
RPL7A	60S ribosomal protein L7a	18.8	5	-	41.4	47.6	N
RPL9	60S ribosomal protein L9	12.8	Hybrid only	-	-	-	-
RPLP0	60S acidic ribosomal protein P0;60S acidic ribosomal protein P0-like	6.86667	1.05882	-	-	-	-
RPLP2	60S acidic ribosomal protein P2	9.6	1	-	51.1	80.4	N
RPN1	Dolichyl-diphosphooligosaccharide--protein glycosyltransferase subunit 1	0.261682	0.576923	-	-	-	-
RPN2	Dolichyl-diphosphooligosaccharide--protein glycosyltransferase subunit 2	0.350649	0.777778	-	-	-	-
RPRD2	Regulation of nuclear pre-mRNA domain-containing protein 2	Hybrid only	5	-	63.5	75.5	Y
RPS10	40S ribosomal protein S10;Putative 40S ribosomal protein S10-like	2.37037	2.625	-	45.9	46.5	N
RPS11	40S ribosomal protein S11	2.36364	1.8	-	78	76.8	N
RPS12	40S ribosomal protein S12	4.14286	1.4	-	-	-	-
RPS13	40S ribosomal protein S13	2.09091	0.923077	-	-	-	-
RPS14	40S ribosomal protein S14	2.54545	1.33333	-	-	-	-
RPS15	40S ribosomal protein S15	2.15385	1.41667	-	-	-	-
RPS16	40S ribosomal protein S16	1.7931	0.894737	-	-	-	-
RPS17	40S ribosomal protein S17	1.62162	1.35	-	-	-	-
RPS18	40S ribosomal protein S18	0.92	1.15	-	-	-	-
RPS19	40S ribosomal protein S19	2.05882	1.45455	-	-	-	-
RPS2	40S ribosomal protein S2	5.66667	1.83333	-	-	-	-
RPS24	40S ribosomal protein S24	1.96667	1.21053	-	44.3	65.6	N
RPS25	40S ribosomal protein S25	1.53333	2.16667	-	100	100	N
RPS27A	Ubiquitin-40S ribosomal protein S27a;Ubiquitin;40S ribosomal protein S27a;Ubiquitin-60S ribosomal protein L40;Ubiquitin;60S ribosomal protein L40;Polyubiquitin-B;Ubiquitin;Polyubiquitin-C;Ubiquitin	1.14286	0.933333	-	-	-	-
RPS3	40S ribosomal protein S3	2.07692	1.93548	-	-	-	-
RPS3A	40S ribosomal protein S3a	8.08333	2.44444	-	44.1	50.3	N
RPS4X	40S ribosomal protein S4;40S ribosomal protein S4, X isoform	3.59259	1.5	-	-	-	-
RPS5	40S ribosomal protein S5;40S ribosomal protein S5, N-terminally processed	1.74074	2	-	-	-	-
RPS6	40S ribosomal protein S6	5.45455	2	-	-	-	-
RPS7	40S ribosomal protein S7	2.03226	2.06667	-	-	-	-
RPS8	40S ribosomal protein S8	5.21053	1.14286	-	43.1	45.2	N
RPS9	40S ribosomal protein S9	3.47059	2.28571	-	-	-	-
RPSA	40S ribosomal protein SA	2.16667	1.11765	-	35	34.3	N
RRBP1	Ribosome-binding protein 1	0.88	0.972222	-	71.8	93.1	N
RTCB	tRNA-splicing ligase RtcB homolog	2.36364	6	Y	-	-	-
RUVBL1	RuvB-like 1	1.75	0.818182	-	-	-	-
RUVBL2	RuvB-like 2	2.42857	0.571429	Y	43.6	69.2	N
SAFB	Scaffold attachment factor B1	0.391304	0.714286	Y	74.5	86.8	N
SAMD9	Sterile alpha motif domain-containing protein 9	1.33333	2.6	-	-	-	-
SARNP	SAP domain-containing ribonucleoprotein	0.5	0.333333	-	66.7	85	N
SARS	Serine--tRNA ligase, cytoplasmic	0.763158	0.933333	-	-	-	-
SART1	U4/U6.U5 tri-snRNP-associated protein 1	2.14815	1	Y	92.1	100	N
SART3	Squamous cell carcinoma antigen recognized by T-cells 3	9.66667	4	Y	-	-	-
SCYL1	N-terminal kinase-like protein	0.428571	1.5	-	-	-	-
SCYL2	SCY1-like protein 2	5.5	2.66667	-	-	-	-
SEPT1	Septin-1	0.777778	0.6	-	-	-	-
SEPT2	Septin-2	0.545455	0.833333	-	-	-	-
SEPT6	Septin-6	1.5	0.428571	-	-	-	-
SEPT7	Septin-7	1.53846	1	-	-	-	-
SEPT9	Septin-9	0.592593	1.33333	-	-	-	-
SERBP1	Plasminogen activator inhibitor 1 RNA-binding protein	0.776596	0.632653	Y	95.6	100	N
SERPINB9	Serpin B9	0.625	1.16667	-	-	-	-
SET	Protein SET	0.857143	0.939759	-	100	100	N
SF1	Splicing factor 1	5	11.1667	-	98	100	N
SF3A1	Splicing factor 3A subunit 1	1.36	1.4	-	100	100	N
SF3A3	Splicing factor 3A subunit 3	0.785714	3.5	-	38.9	37.1	Y
SF3B1	Splicing factor 3B subunit 1	1.16071	2.46154	-	50	70.8	N
SF3B3	Splicing factor 3B subunit 3	1	1.05882	-	-	-	-
SFPQ	Splicing factor, proline- and glutamine-rich	2.28261	3.40909	Y	100	100	Y
SFXN1	Sideroflexin-1	1.6	1.25	-	-	-	-
SH3KBP1	SH3 domain-containing kinase-binding protein 1	0.478261	0.375	-	58.7	80.8	N
SKIV2L	Helicase SKI2W	Hybrid only	15	-	-	-	-
SKIV2L2	Superkiller viralicidic activity 2-like 2	5.53846	5	Y	-	-	-
SLC25A11	Mitochondrial 2-oxoglutarate/malate carrier protein	2.33333	0.6	-	-	-	-
SLC25A12	Calcium-binding mitochondrial carrier protein Aralar1	1.46154	1.25	-	-	-	-
SLC25A13	Calcium-binding mitochondrial carrier protein Aralar2	2.25	0.75	-	-	-	-
SLC25A3	Phosphate carrier protein, mitochondrial	1.13333	1.33333	-	46.7	48.4	N
SLC25A5	ADP/ATP translocase 2;ADP/ATP translocase 2, N-terminally processed	2.23077	1.10526	Y	-	-	-
SLC25A6	ADP/ATP translocase 3;ADP/ATP translocase 3, N-terminally processed	1.6	1.25	-	-	-	-
SLIRP	SRA stem-loop-interacting RNA-binding protein, mitochondrial	1.5	3.57143	-	-	-	-
SMAP2	Stromal membrane-associated protein 2	2.66667	2	-	36.3	49.8	N
SMARCA4	Transcription activator BRG1	2.125	1.25	Y	52.9	66.7	N
SMARCA5	SWI/SNF-related matrix-associated actin-dependent regulator of chromatin subfamily A member 5	1.31818	1	Y	30.4	35.4	Y
SMARCAL1	SWI/SNF-related matrix-associated actin-dependent regulator of chromatin subfamily A-like protein 1	0.5	1.6	-	100	100	N
SMARCC1	SWI/SNF complex subunit SMARCC1	0.428571	1.25	-	-	-	-
SMC1A	Structural maintenance of chromosomes protein 1A	1.22727	1.54545	-	58.4	69.9	N
SMC3	Structural maintenance of chromosomes protein 3	1.12195	1.26667	-	36.3	51.4	N
SMC4	Structural maintenance of chromosomes protein;Structural maintenance of chromosomes protein 4	0.944444	0.6	-	100	100	N
SMC6	Structural maintenance of chromosomes protein 6	3	2	-	82.5	86	N
SMCHD1	Structural maintenance of chromosomes flexible hinge domain-containing protein 1	0.52	0.857143	-	-	-	-
SMNDC1	Survival of motor neuron-related-splicing factor 30	0.666667	1.66667	-	59.7	81.1	Y
SMU1	WD40 repeat-containing protein SMU1;WD40 repeat-containing protein SMU1, N-terminally processed	1.58333	1.16667	-	-	-	-
SNC73	Ig alpha-1 chain C region;Ig alpha-2 chain C region	1.4	1.42857	-	-	-	-
SND1	Staphylococcal nuclease domain-containing protein 1	2.16049	1.95556	Y	-	-	-
SNRNP200	U5 small nuclear ribonucleoprotein 200 kDa helicase	2.14545	2.45455	Y	-	-	-
SNRP70	U1 small nuclear ribonucleoprotein 70 kDa	2.27273	2.33333	-	-	-	-
SNRPD1	Small nuclear ribonucleoprotein Sm D1	1.22222	2.2	Y	-	-	-
SNRPD2	Small nuclear ribonucleoprotein Sm D2	2.2	4	Y	56.4	85.9	N
SNW1	SNW domain-containing protein 1	1.28571	2.5	Y	74.6	97.3	N
SON	Protein SON	8.75	Hybrid only	Y	52.4	72.2	N
SPTAN1	Spectrin alpha chain, non-erythrocytic 1	0.75	1	-	-	-	-
SPTBN1	Spectrin beta chain, non-erythrocytic 1	0.8	0.88	-	-	-	-
SQSTM1	Sequestosome-1;Tyrosine-protein kinase receptor	2	1.16667	-	38.9	43.7	N
SRBD1	S1 RNA-binding domain-containing protein 1	1.04545	3	-	-	-	-
SRP14	Signal recognition particle 14 kDa protein	1.9	2	Y	-	-	-
SRP68	Signal recognition particle subunit SRP68	4.14286	2	-	100	100	N
SRPK1	SRSF protein kinase 1	Hybrid only	Hybrid only	Y	67.8	98.3	N
SRPR	Signal recognition particle receptor subunit alpha	1.12	1	-	-	-	-
SRPRB	Signal recognition particle receptor subunit beta	0.916667	0.666667	-	-	-	-
SRRM2	Serine/arginine repetitive matrix protein 2	0.833333	2.16667	Y	59.1	99.1	N
SRSF1	Serine/arginine-rich splicing factor 1	2.54545	2.66667	Y	30.1	38.4	N
SRSF10	Serine/arginine-rich splicing factor 10	0.590909	3.66667	Y	59.3	59.9	Y
SRSF7	Serine/arginine-rich splicing factor 7	0.785714	5	Y	-	-	-
SSB	Lupus La protein	Hybrid only	1.14286	-	-	-	-
SSBP1	Single-stranded DNA-binding protein;Single-stranded DNA-binding protein, mitochondrial	0.6	1.75	-	-	-	-
SSRP1	FACT complex subunit SSRP1	3.45455	1	Y	-	-	-
STAT1	Signal transducer and activator of transcription 1-alpha/beta;Signal transducer and activator of transcription	1.40909	1.04	-	-	-	-
STAU1	Double-stranded RNA-binding protein Staufen homolog 1	21.6667	Hybrid only	Y	44.2	67.8	N
STK10	Serine/threonine-protein kinase 10	0.666667	0.25	-	68	86.1	N
STOML2	Stomatin-like protein 2, mitochondrial	2.33333	1	-	-	-	-
STRAP	Serine-threonine kinase receptor-associated protein	1.77778	1.5	Y	-	-	-
STT3B	Dolichyl-diphosphooligosaccharide--protein glycosyltransferase subunit STT3B	0.191489	0.714286	-	-	-	-
SUPT16H	FACT complex subunit SPT16	4.27273	1.33333	Y	-	-	-
SUPT5H	Transcription elongation factor SPT5	3.5	2.8	-	100	100	N
SYNCRIP	Heterogeneous nuclear ribonucleoprotein Q	0.95	1.46667	Y	42.5	44.8	Y
TAF15	TATA-binding protein-associated factor 2N	4	4	Y	99.2	100	Y
TAOK3	Serine/threonine-protein kinase TAO3	0.533333	0.2	-	100	100	N
TAP1	Antigen peptide transporter 1	2.4	1.16667	-	-	-	-
TARS	Threonine--tRNA ligase, cytoplasmic	0.409091	0.55	Y	97	100	N
TBC1D10B	TBC1 domain family member 10B	0.956522	1.4	-	-	-	-
TBL3	Transducin beta-like protein 3	34.5	4	Y	-	-	-
TCERG1	Transcription elongation regulator 1	0.551724	0.85	-	50	77.5	N
TCOF1	Treacle protein	6	1.33333	Y	100	100	N
TCP1	T-complex protein 1 subunit alpha	3.08333	1.55556	Y	-	-	-
TFAM	Transcription factor A, mitochondrial	0.131579	0.625	-	-	-	-
TFG	Protein TFG;Tyrosine-protein kinase receptor	6.875	9	-	-	-	-
TFRC	Transferrin receptor protein 1;Transferrin receptor protein 1, serum form	0.8	1.07692	-	-	-	-
THOC2	THO complex subunit 2	0.434783	0.5	-	100	100	N
THRAP3	Thyroid hormone receptor-associated protein 3	2.19048	1	Y	100	100	N
THYN1	Thymocyte nuclear protein 1	0.368421	0.214286	-	57.8	66.3	N
TIAL1	Nucleolysin TIAR;Nucleolysin TIA-1 isoform p40	0.888889	3.16667	-	-	-	-
TLN1	Talin-1	0.428571	1.2	-	-	-	-
TMEM214	Transmembrane protein 214	0.846154	1.25	-	-	-	-
TMPO	Lamina-associated polypeptide 2, isoform alpha;Thymopoietin;Thymopentin	0.442308	0.433962	-	58.5	78	N
TNIK	TRAF2 and NCK-interacting protein kinase	4	2.33333	-	37.1	40.3	N
TNRC15	PERQ amino acid-rich with GYF domain-containing protein 2	4.66667	1.14286	-	-	-	-
TNRC6B	Trinucleotide repeat-containing gene 6B protein	4.66667	Hybrid only	-	100	100	N
TOP1	DNA topoisomerase 1	0.386243	0.277778	Y	42.5	51.9	N
TOP2B	DNA topoisomerase 2;DNA topoisomerase 2-beta	8.33333	0.666667	-	-	-	-
TPR	Nucleoprotein TPR	0.692308	3	-	69.3	97.3	N
TRA1	Endoplasmin	1.47368	1.22727	-	-	-	-
TRAF1	TNF receptor-associated factor 1	2	1.8	-	-	-	-
TRAP1	Heat shock protein 75 kDa, mitochondrial	1.66667	0.777778	-	65.1	59.3	N
TREX1	Three-prime repair exonuclease 1	0.210526	0.923077	-	44	50.3	Y
TRIM25	E3 ubiquitin/ISG15 ligase TRIM25	3.66667	Hybrid only	-	-	-	-
TRIM26	Tripartite motif-containing protein 26	Hybrid only	1	-	-	-	-
TRIM28	Transcription intermediary factor 1-beta	1.125	1	-	-	-	-
TRIP4	Activating signal cointegrator 1	2.4	5	-	-	-	-
TRMT2A	tRNA (uracil-5-)-methyltransferase homolog A	Hybrid only	Hybrid only	-	45.4	39.5	N
TSR1	Pre-rRNA-processing protein TSR1 homolog	2.25	11	Y	-	-	-
TTC37	Tetratricopeptide repeat protein 37	Hybrid only	Hybrid only	-	-	-	-
TUBA1B	Tubulin alpha-1B chain	1.41667	1.03797	-	59.2	57.1	N
TUBB	Tubulin beta chain	1.15909	0.881818	-	-	-	-
TUBB2C	Tubulin beta-4B chain	1.56	0.75	-	-	-	-
TUBG1	Tubulin gamma-1 chain;Tubulin gamma-2 chain;Tubulin gamma chain	0.238636	0.171429	-	-	-	-
TUFM	Elongation factor Tu, mitochondrial	1.83333	1.15385	-	36.6	41.6	N
TWISTNB	DNA-directed RNA polymerase I subunit RPA43	1.2	2	-	43.2	44.7	N
TXLNA	Alpha-taxilin	0.322581	2	-	66.5	89.7	N
U2AF1	Splicing factor U2AF 35 kDa subunit	2	7.66667	Y	43.7	44.9	N
U2AF2	Splicing factor U2AF 65 kDa subunit	2	13.5	Y	88.2	76.5	N
U2SURP	U2 snRNP-associated SURP motif-containing protein	1.11111	3.5	Y	64.6	73.6	N
U5-116KD	116 kDa U5 small nuclear ribonucleoprotein component	2.27586	1.42105	-	-	-	-
UBAP2	Ubiquitin-associated protein 2	0.928571	1.27273	-	75.7	98.5	Y
UBAP2L	Ubiquitin-associated protein 2-like	1.21538	1.53846	-	71.8	88.3	Y
UBE1	Ubiquitin-like modifier-activating enzyme 1	1.40909	1.52941	-	-	-	-
UBTF	Nucleolar transcription factor 1	1.05882	0.8125	-	39.6	38.9	N
UFL1	E3 UFM1-protein ligase 1	2	0.666667	-	-	-	-
UHRF1	E3 ubiquitin-protein ligase UHRF1	0.323077	0.27027	Y	41.3	55.5	Y
UPF1	Regulator of nonsense transcripts 1	1.89474	1.7	Y	-	-	-
UPF3B	Regulator of nonsense transcripts 3B	2.75	3	-	61.3	67.7	N
UQCRC2	Cytochrome b-c1 complex subunit 2, mitochondrial	2	0.8	-	-	-	-
USP10	Ubiquitin carboxyl-terminal hydrolase 10	5.6	2.75	Y	-	-	-
USP39	U4/U6.U5 tri-snRNP-associated protein 2	0.512821	0.857143	-	-	-	-
USP7	Ubiquitin carboxyl-terminal hydrolase;Ubiquitin carboxyl-terminal hydrolase 7	2.77778	1	-	-	-	-
UTP14A	U3 small nucleolar RNA-associated protein 14 homolog A	27	5	Y	74.4	99.1	N
VAPA	Vesicle-associated membrane protein-associated protein A	1	0.4	-	-	-	-
VARS	Valine--tRNA ligase	0.9	1.2	Y	-	-	-
VASP	Vasodilator-stimulated phosphoprotein	0.75	1.3	-	56.5	60.9	N
VDAC1	Voltage-dependent anion-selective channel protein 1	0.9	1.4	-	-	-	-
VDAC2	Voltage-dependent anion-selective channel protein 2	1	0.909091	Y	-	-	-
VDAC3	Voltage-dependent anion-selective channel protein 3	1.33333	0.75	-	-	-	-
VRK1	Serine/threonine-protein kinase VRK1	0.678571	0.5625	-	-	-	-
WARS	Tryptophan--tRNA ligase, cytoplasmic;T1-TrpRS;T2-TrpRS	1.33333	1.33333	-	72	60	N
WAS	Wiskott-Aldrich syndrome protein	0.5	1	-	50.9	51.4	N
WASF2	Wiskott-Aldrich syndrome protein family member 2	0.666667	0.777778	-	53.4	64.1	N
WDR3	WD repeat-containing protein 3	27	3.5	Y	-	-	-
WDR36	WD repeat-containing protein 36	9	3	Y	-	-	-
WDR6	WD repeat-containing protein 6	Hybrid only	Hybrid only	-	-	-	-
WIBG	Partner of Y14 and mago	11	2.5	-	-	-	-
WRN	Werner syndrome ATP-dependent helicase	0.15	0.25	-	-	-	-
XPO1	Exportin-1	1.28571	1.125	-	-	-	-
XRCC5	X-ray repair cross-complementing protein 5	0.5	0.533333	-	-	-	-
XRCC6	X-ray repair cross-complementing protein 6	0.463768	0.31746	-	-	-	-
XRN1	5-3 exoribonuclease 1	2.66667	5	-	-	-	-
XRN2	5-3 exoribonuclease 2	3.33333	5.11111	Y	41	44.4	N
YARS	Tyrosine--tRNA ligase, cytoplasmic;Tyrosine--tRNA ligase, cytoplasmic, N-terminally processed	0.705882	0.7	-	-	-	-
YBX1	Nuclease-sensitive element-binding protein 1	1.63636	1.36364	Y	83.3	97.2	Y
YLPM1	YLP motif-containing protein 1	4.42857	1	-	80.8	91.4	N
YTHDC2	Probable ATP-dependent RNA helicase YTHDC2	Hybrid only	Hybrid only	-	78.1	96.4	N
YTHDF2	YTH domain-containing family protein 2	2	Hybrid only	-	46	58.5	Y
YTHDF3	YTH domain-containing family protein 3	1.5	10	-	100	100	N
YWHAQ	14-3-3 protein theta	0.769231	2.33333	-	-	-	-
YWHAZ	14-3-3 protein zeta/delta	1.14286	1.45455	-	38.8	66.3	N
ZC3H11A	Zinc finger CCCH domain-containing protein 11A	1.33333	4	Y	-	-	-
ZC3H15	Zinc finger CCCH domain-containing protein 15	1.78571	1.5	Y	81.1	100	N
ZC3HAV1	Zinc finger CCCH-type antiviral protein 1	7	5.33333	Y	39.6	44.6	N
ZFR	Zinc finger RNA-binding protein	3.875	4.5	Y	39	46.2	N
ZNF207	BUB3-interacting and GLEBS motif-containing protein ZNF207	0.727273	2	Y	83.7	87.7	N
ZNF598	Zinc finger protein 598	2.71429	Hybrid only	-	58.2	64.8	N
