# Supplementary material for: Human proteins that interact with RNA/DNA hybrids
Source: Genome Res. 2018 Sep;28(9):1405–14. doi: 10.1101/gr.237362.118 (PMC6120628; doi:10.1101/gr.237362.118)
Supplement: Supplemental Material [file supp_gr.237362.118_Supplemental_Table_S2.xlsx]

## Sheet: Sheet1
Table S2. Proteins that are repelled by RNA/DNA hybrids.
Protein	Description	Fold Enrichment (dsDNA/hybrid)
		BAMBI	DPP9
APEX1	DNA-(apurinic or apyrimidinic site) lyase	1.89831	1.55357
ARID1A	AT-rich interactive domain-containing protein 1A	9	2.5
CACYBP	Calcyclin-binding protein	1.85714	5.33333
CAPZA1	F-actin-capping protein subunit alpha-1	5.2	1.5
CKAP5	Cytoskeleton-associated protein 5	2.69643	1.275
CLASP1	CLIP-associating protein 1	3.5	3
CUL3	Cullin-3	2	1.33333
CUL4A	Cullin-4A	4.75	1.75
DARS	Aspartate--tRNA ligase, cytoplasmic	1.22222	1.66667
DDB1	DNA damage-binding protein 1	2.86842	1.95455
DDB2	DNA damage-binding protein 2	3.1	2.08333
DDOST	Dolichyl-diphosphooligosaccharide--protein glycosyltransferase 48 kDa subunit	4.61538	2
DNMT1	Cytosine-specific methyltransferase	2.97436	2.75
EEF1A1	Elongation factor 1-alpha	2.10442	1.2027
EEF1B2	Elongation factor 1-beta	2.38462	2
EEF1D	Elongation factor 1-delta	2.18519	1.5625
EEF1G	Elongation factor 1-gamma	2.37681	1.61111
EMD	Emerin	1.5	1.28571
EML4	Echinoderm microtubule-associated protein-like 4	2.05556	2
FEN1	Flap endonuclease 1	2.56757	1.8125
GTF2F1	General transcription factor IIF subunit 1	3	3.33333
HARS	Histidine--tRNA ligase, cytoplasmic	1.28571	1.6
HEL-S-30	Pyruvate kinase	1.225	1.21739
HEL-S-37	Plastin-2	2.35294	1.25532
HEL-S-68p	Phosphoglycerate kinase	1.33333	1.2
HMGB1	High mobility group protein B1	3.73077	1.4
HMGB2	High mobility group protein B2	3.42857	1.35484
HNRNPC	Heterogeneous nuclear ribonucleoproteins C1/C2	1.45	1.66667
IFI16	Gamma-interferon-inducible protein 16	1.51111	1.84848
IMPDH2	Inosine-5-monophosphate dehydrogenase 2	2.14286	1.75
KIF22	Kinesin-like protein KIF22	3.27273	8
KTN1	Kinectin	1.5	1.66667
LIG3	DNA ligase 3	3.28571	2.5
LMNA	Prelamin-A/C	1.79592	1.26316
LMNB1	Lamin-B1	1.57143	1.43478
LMNB2	Lamin-B2	1.95455	1.83333
LOC115098	Coiled-coil domain-containing protein 124	2	1.33333
LRRC47	Leucine-rich repeat-containing protein 47	1.5	1.36364
LSM14A	Protein LSM14 homolog A	2.66667	1.5
MAP1S	Microtubule-associated protein 1S	2.30769	1.6
MNDA	Myeloid cell nuclear differentiation antigen	2.2	4.6
MSH2	DNA mismatch repair protein Msh2	2.5	2.88889
MSH3	DNA mismatch repair protein Msh3	3.42857	1.94118
NFKB1	Nuclear factor NF-kappa-B p105 subunit	6	8
PARP1	Poly [ADP-ribose] polymerase 1	5.4	5.65854
PDS5A	Sister chromatid cohesion protein PDS5 homolog A	1.68	1.375
PFN1	Profilin-1	1.2	1.33333
PLEKHO1	Pleckstrin homology domain-containing family O member 1	2.5	4.5
PNKP	Bifunctional polynucleotide phosphatase/kinase	4.4	2.25
POLB	DNA polymerase beta	3.28571	4.75
PPP1R10	Serine/threonine-protein phosphatase 1 regulatory subunit 10	2.85714	2
PSIP1	PC4 and SFRS1-interacting protein	1.96	4
RB1	Retinoblastoma-associated protein	8	6
RBBP4	Histone-binding protein RBBP4	1.26316	1.25
RCC2	Protein RCC2	1.59091	1.2
RECQL	ATP-dependent DNA helicase Q1	2.63636	1.64865
RFC1	Replication factor C subunit 1	1.26667	3
RFTN1	Raftlin	1.90909	3
RPN1	Dolichyl-diphosphooligosaccharide--protein glycosyltransferase subunit 1	3.82143	1.73333
RPN2	Dolichyl-diphosphooligosaccharide--protein glycosyltransferase subunit 2	2.85185	1.28571
SAFB	Scaffold attachment factor B1	2.55556	1.4
SARNP	SAP domain-containing ribonucleoprotein	2	3
SEP1	Septin-1	1.28571	1.66667
SEP2	Septin-2	1.83333	1.2
SERBP1	Plasminogen activator inhibitor 1 RNA-binding protein	1.28767	1.58065
SH3KBP1	SH3 domain-containing kinase-binding protein 1	2.09091	2.66667
STK10	Serine/threonine-protein kinase 10	1.5	4
STT3B	Dolichyl-diphosphooligosaccharide--protein glycosyltransferase subunit STT3B	5.22222	1.4
TAOK3	Serine/threonine-protein kinase TAO3	1.875	5
TARS	Threonine--tRNA ligase, cytoplasmic	2.44444	1.81818
TFAM	Transcription factor A, mitochondrial	7.6	1.6
THOC2	THO complex subunit 2	2.3	2
THYN1	Thymocyte nuclear protein 1	2.71429	4.66667
TMPO	Lamina-associated polypeptide 2, isoform alpha	2.26087	2.30435
TOP1	DNA topoisomerase 1	2.58904	3.6
TRA2B	Transformer-2 protein homolog beta	1.625	1.25
TUBG1	Tubulin gamma-1 chain	4.19048	5.83333
UHRF1	E3 ubiquitin-protein ligase UHRF1	3.09524	3.7
VRK1	Serine/threonine-protein kinase VRK1	1.47368	1.77778
WASF2	Wiskott-Aldrich syndrome protein family member 2	1.5	1.28571
WRN	Werner syndrome ATP-dependent helicase	6.66667	4
XRCC5	X-ray repair cross-complementing protein 5	2	1.875
XRCC6	X-ray repair cross-complementing protein 6	2.15625	3.15
YARS	Tyrosine--tRNA ligase, cytoplasmic	1.41667	1.42857
