# Supplementary material for: Human proteins that interact with RNA/DNA hybrids
Source: Genome Res. 2018 Sep;28(9):1405–14. doi: 10.1101/gr.237362.118 (PMC6120628; doi:10.1101/gr.237362.118)
Supplement: Supplemental Material [file supp_gr.237362.118_Supplemental_Table_S3.xlsx]

## Sheet: Sheet1
Table S3. Proteins attracted to RNA/DNA hybrids.
Protein	Description	Fold enrichment (Hybrid/dsDNA)
		BAMBI	DPP9
ABCE1	ATP-binding cassette sub-family E member 1	4.66667	1.5
ABCF1	ATP-binding cassette sub-family F member 1	1.93333	1.63636
ACAT1	Acetyl-CoA acetyltransferase, mitochondrial	1.83333	6
ACLY	ATP-citrate synthase	3.3	3.58333
ACP1	Low molecular weight phosphotyrosine protein phosphatase	1.2	5
AGPS	Alkyldihydroxyacetonephosphate synthase, peroxisomal	1.5	2
AHCY	Adenosylhomocysteinase	5.5	1.33333
AIM1	Absent in melanoma 1 protein	3	2
ALDH18A1	Delta-1-pyrroline-5-carboxylate synthase	2.33333	1.33333
ALYREF	THO complex subunit 4	1.6875	1.53846
ANKHD1	Ankyrin repeat and KH domain-containing protein 1	3.1875	6.66667
ANKRD17	Ankyrin repeat domain-containing protein 17	2.57143	4
AP2A1	AP-2 complex subunit alpha-1	4	Hybrid Only
AP2B1	AP-2 complex subunit beta	2.5	2.2
AQR	Intron-binding protein aquarius	3.5	4
ARHGEF2	Rho guanine nucleotide exchange factor 2	7.8	1.5
ASCC3	Activating signal cointegrator 1 complex subunit 3	4.9	5.5
ATAD3A	ATPase family AAA domain-containing protein 3A	2.07692	2.25
ATP2A2	Sarcoplasmic/endoplasmic reticulum calcium ATPase 2	3	8
ATP5C1	ATP synthase subunit gamma	1.4	1.42857
ATP5L	ATP synthase subunit g, mitochondrial	2	1.75
ATXN2L	Ataxin-2-like protein	1.8125	2.16667
BCLAF1	Bcl-2-associated transcription factor 1	3.3125	2.5
C14orf166	UPF0568 protein C14orf166	2.09091	4.71429
CAD	CAD protein	2.42857	1.54545
CAPRIN1	Caprin-1	8.16667	9
CARM1	Histone-arginine methyltransferase CARM1	2.5	3
CCAR2	Cell cycle and apoptosis regulator protein 2	2.5	2.33333
CCNT1	Cyclin-T1	3	2
CCT2	T-complex protein 1 subunit beta	3.63636	1.2
CCT3	T-complex protein 1 subunit gamma	4	2.08333
CCT4	T-complex protein 1 subunit delta	2.06667	1.6
CCT5	T-complex protein 1 subunit epsilon	7	2.6
CCT7	T-complex protein 1 subunit eta	1.75	1.29412
CCT8	T-complex protein 1 subunit theta	1.82353	1.8
CDC5L	Cell division cycle 5-like protein	3.15789	1.33333
CDC73	Parafibromin	2.4	1.66667
CHD4	Chromodomain-helicase-DNA-binding protein 4	1.85366	2.4
CHERP	Calcium homeostasis endoplasmic reticulum protein	2	5
CLINT1	Clathrin interactor 1	1.8125	1.64286
CLTC	Clathrin heavy chain 1	1.57895	1.79167
COPA	Coatomer subunit alpha	2.77419	1.26667
COPB1	Coatomer subunit beta	1.21429	1.625
COPB2	Coatomer subunit beta	2.38462	1.33333
CPSF7	Cleavage and polyadenylation specificity factor subunit 7	2.33333	2
CRYZ	Quinone oxidoreductase	6	1.75
CS	Citrate synthase	5	1.2
CSDE1	Cold shock domain-containing protein E1	6.33333	3.66667
CSNK1A1	Casein kinase I isoform alpha	2.66667	5
CSNK2A1	Casein kinase II subunit alpha	2.66667	3.66667
CSNK2A2	Casein kinase II subunit alpha	Hybrid Only	3
CTPS1	CTP synthase	3.5	2.5
DAP3	28S ribosomal protein S29, mitochondrial	5.5	2.5
DAZAP1	DAZ-associated protein 1	2.14286	2
DDX1	ATP-dependent RNA helicase DDX1	2.08108	7
DDX17	Probable ATP-dependent RNA helicase DDX17	2.92593	3.33333
DDX18	ATP-dependent RNA helicase DDX18	21.75	6
DDX23	Probable ATP-dependent RNA helicase DDX23	2.30769	5
DDX3X	ATP-dependent RNA helicase DDX3X	2.78947	2.2
DDX49	Probable ATP-dependent RNA helicase DDX49	3	Hybrid Only
DDX5	Probable ATP-dependent RNA helicase DDX5	2.96364	2.04545
DDX58	Probable ATP-dependent RNA helicase DDX58	Hybrid Only	Hybrid Only
DDX6	Probable ATP-dependent RNA helicase DDX6	2.45455	1.7
DECR1	2,4-dienoyl-CoA reductase, mitochondrial	3.8	1.5
DHX15	Putative pre-mRNA-splicing factor ATP-dependent RNA helicase DHX15	4.23077	4.375
DHX29	ATP-dependent RNA helicase DHX29	11.6667	3.66667
DHX30	Putative ATP-dependent RNA helicase DHX30	28.25	18.5
DHX36	ATP-dependent RNA helicase DHX36	1.91667	2.30769
DHX37	Probable ATP-dependent RNA helicase DHX37	Hybrid Only	2
DHX38	Pre-mRNA-splicing factor ATP-dependent RNA helicase PRP16	2.75	2
DHX9	ATP-dependent RNA helicase A	3.47059	1.64516
DIMT1	Probable dimethyladenosine transferase	4.66667	Hybrid Only
DIS3	Exosome complex exonuclease RRP44	1.35294	2.71429
DIS3L	DIS3-like exonuclease 1	Hybrid Only	Hybrid Only
DKC1	H/ACA ribonucleoprotein complex subunit 4	14.6667	3
DNAJA2	DnaJ homolog subfamily A member 2	1.6	4
DNAJA3	DnaJ homolog subfamily A member 3, mitochondrial	2.4	1.5
EEF2	Elongation factor 2	2.68889	1.31111
EIF2A	Eukaryotic translation initiation factor 2A	10.5	2.66667
EIF2AK2	Interferon-induced, double-stranded RNA-activated protein kinase	13	6
EIF2C2	Protein argonaute	3.4	5.5
EIF3A	Eukaryotic translation initiation factor 3 subunit A	2	1.4375
EIF3C	Eukaryotic translation initiation factor 3 subunit C	2	1.25
EIF3D	Eukaryotic translation initiation factor 3 subunit D	2.58333	1.3
EIF3L	Eukaryotic translation initiation factor 3 subunit L	2.4	1.25
EIF3S9	Eukaryotic translation initiation factor 3 subunit B	1.70833	2.83333
EIF4A1	Eukaryotic initiation factor 4A-I	1.82353	1.22727
EIF4G1	Eukaryotic translation initiation factor 4 gamma 1	1.44444	1.25
EIF4G2	Eukaryotic translation initiation factor 4 gamma 2	2.53333	1.84615
EL52	Heat shock protein HSP 90-alpha	1.4375	1.59091
EMG1	Ribosomal RNA small subunit methyltransferase NEP1	3.66667	1.66667
EWSR1	RNA-binding protein EWS	1.36585	3.83333
EXOSC10	Exosome component 10	35	7
EXOSC2	Exosome complex component RRP4	9	5
EXOSC3	Exosome complex component RRP40	Hybrid Only	Hybrid Only
EXOSC4	Exosome complex component RRP41	Hybrid Only	3
EXOSC6	Exosome complex component MTR3	Hybrid Only	Hybrid Only
EXOSC9	Exosome complex component RRP45	3	Hybrid Only
FAM120A	Constitutive coactivator of PPAR-gamma-like protein 1	2.875	8.5
FAM62A	Extended synaptotagmin-1	1.22222	1.66667
FAM98A	Protein FAM98A	2.75	3.8
FAM98B	Protein FAM98B	2.25	26
FARSLA	Phenylalanine--tRNA ligase alpha subunit	1.72222	2.83333
FASN	Fatty acid synthase	2.11111	1.33333
FBL	rRNA 2-O-methyltransferase fibrillarin	6.5	1.2
FLII	Protein flightless-1 homolog	4.57143	4
FRG1	Protein FRG1	1.33333	1.66667
FUBP1	Far upstream element-binding protein 1	2.11111	4
FUS	RNA-binding protein FUS	3.08824	3.46154
FXR1	Fragile X mental retardation syndrome-related protein 1	8.83333	1.25
G3BP1	Ras GTPase-activating protein-binding protein 1	2.1875	2.95238
G3BP2	Ras GTPase-activating protein-binding protein 2	4.66667	2.375
GAPDH	Glyceraldehyde-3-phosphate dehydrogenase	1.27451	1.38095
GART	Trifunctional purine biosynthetic protein adenosine-3	2	2
GFPT1	Glutamine--fructose-6-phosphate aminotransferase [isomerizing] 1	5	1.8
GNB2L1	Guanine nucleotide-binding protein subunit beta-2-like 1	2.3	1.55556
GNL3	Guanine nucleotide-binding protein-like 3	9.6	2.5
GOLGA2	Golgin subfamily A member 2	2	1.5
HADHB	Trifunctional enzyme subunit beta, mitochondrial	1.25	1.30435
hCG_1994130	40S ribosomal protein S15a	4.70588	1.6
hCG_2032701	Dolichyl-diphosphooligosaccharide--protein glycosyltransferase subunit STT3A	2.25	1.75
hCG_27698	Probable ATP-dependent RNA helicase DDX47	15.3333	Hybrid Only
hCG_30204	Acetyl-CoA carboxylase 1	4.25	2
hCG_31253	Far upstream element-binding protein 3	4	11
HDLBP	Vigilin	1.82353	17.6
HEATR1		33	2
HNRNPA0	Heterogeneous nuclear ribonucleoprotein A0	1.57143	1.5
HNRNPH1	Heterogeneous nuclear ribonucleoprotein H	2.29032	1.625
HNRNPM	Heterogeneous nuclear ribonucleoprotein M	3.7234	1.8
HNRNPUL1	Heterogeneous nuclear ribonucleoprotein U-like protein 1	2.17647	2
HNRPF	Heterogeneous nuclear ribonucleoprotein F	5.88889	1.5
HSD17B12	Estradiol 17-beta-dehydrogenase 12	2	5
HSD17B4	Peroxisomal multifunctional enzyme type 2	1.5	2.5
HSP90AB1	Heat shock protein HSP 90-beta	1.76786	1.26087
HSPA14	Heat shock 70 kDa protein 14	1.3	1.5
HSPH1	Heat shock protein 105 kDa	1.36364	1.33333
HUWE1	E3 ubiquitin-protein ligase HUWE1	3	3
HYOU1	Hypoxia up-regulated protein 1	4	1.54545
IGF2BP1	Insulin-like growth factor 2 mRNA-binding protein 1	5	Hybrid Only
IGF2BP3	Insulin-like growth factor 2 mRNA-binding protein 3	2.58333	6.33333
ILF2	Interleukin enhancer-binding factor 2	1.44444	2.63636
ILF3	Interleukin enhancer-binding factor 3	1.98214	3.71429
IPO9	Importin-9	2	1.5
JTV1	Aminoacyl tRNA synthase complex-interacting multifunctional protein 2	1.33333	1.2
KHDRBS1	KH domain-containing, RNA-binding, signal transduction-associated protein 1	1.35714	1.6875
KIF5B	Tyrosine-protein kinase receptor	1.8	2
KPNA2	Importin subunit alpha	1.90476	1.375
LARP1	La-related protein 1	3.54545	3
LARP4B	La-related protein 4B	2.14286	Hybrid Only
LARS	Leucine--tRNA ligase, cytoplasmic	1.21429	1.28571
LBR	Lamin-B receptor	1.83333	1.5
LRPPRC	Leucine-rich PPR motif-containing protein, mitochondrial	3.07895	10.1154
LRRFIP1	Leucine-rich repeat flightless-interacting protein 1	15.6667	11
LSP1	Lymphocyte-specific protein 1	2.33333	1.75
LYAR	Cell growth-regulating nucleolar protein	Hybrid Only	6
MATR3	Matrin-3	2.19231	1.58824
MBNL1	Muscleblind-like protein 1	2	13
MCM3	DNA replication licensing factor MCM3	1.80769	1.8
MCM5	DNA replication licensing factor MCM5	2.23077	2.5
MCM6	DNA replication licensing factor MCM6	2.5	1.28571
METAP2	Methionine aminopeptidase 2	4	Hybrid Only
MKI67	Antigen KI-67	2.52239	1.25
MOV10	Putative helicase MOV-10	11.5	5
MRPS7	28S ribosomal protein S7, mitochondrial	2	9
MS4A1	B-lymphocyte antigen CD20	1.2	2.25
MTDH	Protein LYRIC	2.06522	1.59091
MTHFD1	C-1-tetrahydrofolate synthase, cytoplasmic	3.91667	2
MTHFD1L	Monofunctional C1-tetrahydrofolate synthase, mitochondrial	12	Hybrid Only
MX1	Interferon-induced GTP-binding protein Mx1	1.25	1.42857
MYBBP1A	Myb-binding protein 1A	18.5714	3.5
MYH9	Myosin-9	1.46479	1.2
MYL12A	Myosin regulatory light chain 12A	1.33333	1.8
MYO1E	Unconventional myosin-Ie	1.81818	1.33333
MYO1G	Unconventional myosin-Ig	1.8	1.76923
MYO5A	Unconventional myosin-Va	Hybrid Only	Hybrid Only
MYO6	Unconventional myosin-VI	2	4
MYO9B	Unconventional myosin-IXb	2.5	1.5
NAP1L4	Nucleosome assembly protein 1-like 4	7	1.2
NAT10	N-acetyltransferase 10	8.33333	2.57143
NCL	Nucleolin	6.55814	3.62222
NIFK	MKI67 FHA domain-interacting nucleolar phosphoprotein	9.5	1.30769
NKRF	NF-kappa-B-repressing factor	Hybrid Only	Hybrid Only
NOC4L	Nucleolar complex protein 4 homolog	17.6667	4
NOL6	Nucleolar protein 6	20.25	Hybrid Only
NONO	Non-POU domain-containing octamer-binding protein	2.40541	3.08
NOP2	Probable 28S rRNA (cytosine(4447)-C(5))-methyltransferase	10.1	2
NOP58	Nucleolar protein 58	8.77778	1.75
NPM1	Nucleophosmin	14.7188	7.16216
NPM3	Nucleoplasmin-3	Hybrid Only	Hybrid Only
NSUN5	Probable 28S rRNA (cytosine-C(5))-methyltransferase	7.5	3
NUFIP2	Nuclear fragile X mental retardation-interacting protein 2	10	4.5
NUP133	Nuclear pore complex protein Nup133	2.5	1.25
NUP153	Nuclear pore complex protein Nup153	1.20513	2.22222
NUP155	Nuclear pore complex protein Nup155	1.85714	3
NUP160	Nuclear pore complex protein Nup160	2.66667	3
NUP205	Nuclear pore complex protein Nup205	1.8	1.5
NUP210	Nuclear pore membrane glycoprotein 210	1.53846	1.28571
NUP214	Nuclear pore complex protein Nup214	1.91667	1.66667
NUP98	Nuclear pore complex protein Nup98-Nup96	1.92308	1.25
OAS3	2-5-oligoadenylate synthase 3	15	4
PA2G4	Proliferation-associated protein 2G4	2.29545	2.28571
PABPC1	Polyadenylate-binding protein 1	2.16667	1.59091
PABPC4	Polyadenylate-binding protein 4	3.75	3
PDCD11	Protein RRP5 homolog	40.25	Hybrid Only
PEG10	Retrotransposon-derived protein PEG10	Hybrid Only	5.33333
PFKL	ATP-dependent 6-phosphofructokinase, liver type	4	1.25
PFKP	ATP-dependent 6-phosphofructokinase, platelet type	12	3.4
PHGDH	D-3-phosphoglycerate dehydrogenase	6	1.25
PIP4K2A	Phosphatidylinositol 5-phosphate 4-kinase type-2 alpha	1.2	1.4
PIP5K1A	Phosphatidylinositol 4-phosphate 5-kinase type-1 alpha	15	4
PLCG2	1-phosphatidylinositol 4,5-bisphosphate phosphodiesterase gamma-2	2.2	Hybrid Only
PLD1	Phospholipase D1	2	1.66667
PLEC	Plectin	3.33333	2.66667
PLRG1	Pleiotropic regulator 1	4.5	1.5
PNO1	RNA-binding protein PNO1	3	7.5
PNPT1	Polyribonucleotide nucleotidyltransferase 1, mitochondrial	9.5	Hybrid Only
POLD1	DNA polymerase	1.5625	1.42857
POLDIP3	Polymerase delta-interacting protein 3	2.33333	1.4
POLR1A	DNA-directed RNA polymerase I subunit RPA1	2.85714	4
POLR2A	DNA-directed RNA polymerase II subunit RPB1	2.7	3
POLR2B	DNA-directed RNA polymerase	2.66667	2.5
POM121C	Nuclear envelope pore membrane protein POM 121C	1.5	1.5
POP1	Ribonucleases P/MRP protein subunit POP1	16.3333	5
PPP1CC	Serine/threonine-protein phosphatase	5.5	4
PRDX5	Peroxiredoxin-5, mitochondrial	5	2
PRIC295	Translational activator GCN1	2.15385	1.27273
PRKDC	DNA-dependent protein kinase catalytic subunit	1.2807	2.4375
PRKRA	Interferon-inducible double-stranded RNA-dependent protein kinase activator A	Hybrid Only	Hybrid Only
PRMT1	Protein arginine N-methyltransferase 1	1.25	2.66667
PRMT5	Protein arginine N-methyltransferase 5	3	Hybrid Only
PRPF3	U4/U6 small nuclear ribonucleoprotein Prp3	6.66667	3
PRPF31	U4/U6 small nuclear ribonucleoprotein Prp31	3	1.66667
PRPF4	U4/U6 small nuclear ribonucleoprotein Prp4	7	1.25
PRPF8	Pre-mRNA-processing-splicing factor 8	2.64583	2.23077
PRRC2A	Protein PRRC2A	2.14286	1.625
PSMD2	26S proteasome non-ATPase regulatory subunit 2	2.75	1.2
PSMD3	26S proteasome non-ATPase regulatory subunit 3	1.5	1.33333
PSPC1	Paraspeckle component 1	1.57143	5.5
PTBP1	Polypyrimidine tract-binding protein 1	1.77143	11.5556
PUM1	Pumilio homolog 1	2.66667	2.33333
PWP1	Periodic tryptophan protein 1 homolog	Hybrid Only	Hybrid Only
PWP2	Periodic tryptophan protein 2 homolog	37	Hybrid Only
PYCR1	Pyrroline-5-carboxylate reductase	4	6
RAB7A	Ras-related protein Rab-7a	1.6	1.25
RANBP2	E3 SUMO-protein ligase RanBP2	2.8	Hybrid Only
RASAL3	RAS protein activator like-3	1.4375	1.33333
RAVER1	Ribonucleoprotein PTB-binding 1	1.73077	1.91667
RBBP6	E3 ubiquitin-protein ligase RBBP6	1.83333	3
RBM10	RNA-binding protein 10	9	6
RBM14	RNA-binding protein 14	3.6129	2.45455
RBM15	Putative RNA-binding protein 15	3.71429	2.5
RBM27	RNA-binding protein 27	1.45455	1.22222
RBM4	RNA-binding protein 4	5.33333	3.5
RBM5	RNA-binding protein 5	7	6
RNASEH1	Ribonuclease H1	5	13
RNASEH2B	Ribonuclease H2 subunit B	2	2.33333
RNASEH2C	Ribonuclease H2 subunit C	1.22222	Hybrid Only
RNF213	E3 ubiquitin-protein ligase RNF213	12.75	13
ROD1	Polypyrimidine tract-binding protein 3	4	Hybrid Only
RPL10A	60S ribosomal protein L10a	9.6	1.2
RPL12	60S ribosomal protein L12	7	2
RPL13	60S ribosomal protein L13	4.3	1.33333
RPL13A	60S ribosomal protein L13a	21	1.4
RPL17	60S ribosomal protein L17	7.85714	1.5
RPL23A	60S ribosomal protein L23a	3	2
RPL24	60S ribosomal protein L24	3.36364	1.6
RPL26	60S ribosomal protein L26-like 1	3.18182	3.33333
RPL3	60S ribosomal protein L3	15.625	2.4
RPL4	60S ribosomal protein L4	16.5714	1.41667
RPL5	60S ribosomal protein L5	29.5	1.5
RPL7	60S ribosomal protein L7	8.88889	1.55556
RPL7A	60S ribosomal protein L7a	18.8	5
RPL9	60S ribosomal protein L9	12.8	Hybrid Only
RPRD2	Regulation of nuclear pre-mRNA domain-containing protein 2	Hybrid Only	5
RPS10	40S ribosomal protein S10	2.37037	2.625
RPS11	40S ribosomal protein S11	2.36364	1.8
RPS12	40S ribosomal protein S12	4.14286	1.4
RPS14	40S ribosomal protein S14	2.54545	1.33333
RPS15	40S ribosomal protein S15	2.15385	1.41667
RPS17	40S ribosomal protein S17	1.62162	1.35
RPS19	40S ribosomal protein S19	2.05882	1.45455
RPS2	40S ribosomal protein S2	5.66667	1.83333
RPS24	40S ribosomal protein S24	1.96667	1.21053
RPS25	40S ribosomal protein S25	1.53333	2.16667
RPS3	40S ribosomal protein S3	2.07692	1.93548
RPS3A	40S ribosomal protein S3a	8.08333	2.44444
RPS4X	40S ribosomal protein S4	3.59259	1.5
RPS5	40S ribosomal protein S5	1.74074	2
RPS6	40S ribosomal protein S6	5.45455	2
RPS7	40S ribosomal protein S7	2.03226	2.06667
RPS9	40S ribosomal protein S9	3.47059	2.28571
RTCB	tRNA-splicing ligase RtcB homolog	2.36364	6
SAMD9	Sterile alpha motif domain-containing protein 9	1.33333	2.6
SART3	Squamous cell carcinoma antigen recognized by T-cells 3	9.66667	4
SCYL2	SCY1-like protein 2	5.5	2.66667
SF1	Splicing factor 1	5	11.1667
SF3A1	Splicing factor 3A subunit 1	1.36	1.4
SFPQ	Splicing factor, proline- and glutamine-rich	2.28261	3.40909
SFXN1	Sideroflexin-1	1.6	1.25
SKIV2L	Helicase SKI2W	Hybrid Only	15
SKIV2L2	Superkiller viralicidic activity 2-like 2	5.53846	5
SLC25A12	Calcium-binding mitochondrial carrier protein Aralar1	1.46154	1.25
SLC25A6	ADP/ATP translocase 3	1.6	1.25
SLIRP	SRA stem-loop-interacting RNA-binding protein, mitochondrial	1.5	3.57143
SMAP2	Stromal membrane-associated protein 2	2.66667	2
SMARCA4	Transcription activator BRG1	2.125	1.25
SMC1A	Structural maintenance of chromosomes protein 1A	1.22727	1.54545
SMC6	Structural maintenance of chromosomes protein 6	3	2
SNC73	Ig alpha-1 chain C region	1.4	1.42857
SND1	Staphylococcal nuclease domain-containing protein 1	2.16049	1.95556
SNRNP200	U5 small nuclear ribonucleoprotein 200 kDa helicase	2.14545	2.45455
SNRP70	U1 small nuclear ribonucleoprotein 70 kDa	2.27273	2.33333
SNRPD1	Small nuclear ribonucleoprotein Sm D1	1.22222	2.2
SNRPD2	Small nuclear ribonucleoprotein Sm D2	2.2	4
SNW1	SNW domain-containing protein 1	1.28571	2.5
SON	Protein SON	8.75	Hybrid Only
SRP14	Signal recognition particle 14 kDa protein	1.9	2
SRP68	Signal recognition particle subunit SRP68	4.14286	2
SRPK1	SRSF protein kinase 1	Hybrid Only	Hybrid Only
SRSF1	Serine/arginine-rich splicing factor 1	2.54545	2.66667
STAU1	Double-stranded RNA-binding protein Staufen homolog 1	21.6667	Hybrid Only
STRAP	Serine-threonine kinase receptor-associated protein	1.77778	1.5
SUPT16H	FACT complex subunit SPT16	4.27273	1.33333
SUPT5H	Transcription elongation factor SPT5	3.5	2.8
TAF15	TATA-binding protein-associated factor 2N	4	4
TBL3	Transducin beta-like protein 3	34.5	4
TCOF1	Treacle protein	6	1.33333
TCP1	T-complex protein 1 subunit alpha	3.08333	1.55556
TFG	Protein TFG	6.875	9
TNIK	TRAF2 and NCK-interacting protein kinase	4	2.33333
TNRC6B	Trinucleotide repeat-containing gene 6B protein	4.66667	Hybrid Only
TRA1	Endoplasmin	1.47368	1.22727
TRAF1	TNF receptor-associated factor 1	2	1.8
TRIM25	E3 ubiquitin/ISG15 ligase TRIM25	3.66667	Hybrid Only
TRIP4	Activating signal cointegrator 1	2.4	5
TRMT2A	tRNA (uracil-5-)-methyltransferase homolog A	Hybrid Only	Hybrid Only
TSR1	Pre-rRNA-processing protein TSR1 homolog	2.25	11
TTC37	Tetratricopeptide repeat protein 37	Hybrid Only	Hybrid Only
TWISTNB	DNA-directed RNA polymerase I subunit RPA43	1.2	2
U2AF1	Splicing factor U2AF 35 kDa subunit	2	7.66667
U2AF2	Splicing factor U2AF 65 kDa subunit	2	13.5
U5-116KD	116 kDa U5 small nuclear ribonucleoprotein component	2.27586	1.42105
UBAP2L	Ubiquitin-associated protein 2-like	1.21538	1.53846
UBE1	Ubiquitin-like modifier-activating enzyme 1	1.40909	1.52941
UPF1	Regulator of nonsense transcripts 1	1.89474	1.7
UPF3B	Regulator of nonsense transcripts 3B	2.75	3
USP10	Ubiquitin carboxyl-terminal hydrolase 10	5.6	2.75
UTP14A	U3 small nucleolar RNA-associated protein 14 homolog A	27	5
WARS	Tryptophan--tRNA ligase, cytoplasmic	1.33333	1.33333
WDR3	WD repeat-containing protein 3	27	3.5
WDR36	WD repeat-containing protein 36	9	3
WDR6	WD repeat-containing protein 6	Hybrid Only	Hybrid Only
WIBG	Partner of Y14 and mago	11	2.5
XRN1	5-3 exoribonuclease 1	2.66667	5
XRN2	5-3 exoribonuclease 2	3.33333	5.11111
YBX1	Nuclease-sensitive element-binding protein 1	1.63636	1.36364
YTHDC2	Probable ATP-dependent RNA helicase YTHDC2	Hybrid Only	Hybrid Only
YTHDF2	YTH domain-containing family protein 2	2	Hybrid Only
YTHDF3	YTH domain-containing family protein 3	1.5	10
ZC3H11A	Zinc finger CCCH domain-containing protein 11A	1.33333	4
ZC3H15	Zinc finger CCCH domain-containing protein 15	1.78571	1.5
ZC3HAV1	Zinc finger CCCH-type antiviral protein 1	7	5.33333
ZFR	Zinc finger RNA-binding protein	3.875	4.5
ZNF598	Zinc finger protein 598	2.71429	Hybrid Only
