# Supplementary material for: Human proteins that interact with RNA/DNA hybrids
Source: Genome Res. 2018 Sep;28(9):1405–14. doi: 10.1101/gr.237362.118 (PMC6120628; doi:10.1101/gr.237362.118)
Supplement: Supplemental Material [file supp_gr.237362.118_Supplemental_Table_S4.xlsx]

## Sheet: Sheet1
Table S4. Primers and adapters used in this study.
Primer 1-RT	GCCTTGGCACCCGAGAATTCCA	PAR-CLIP, RT primer
Primer 1-3'PCR	CAAGCAGAAGACGGCATACGAGATCGTGATGTGACTGGAGTTCCTTGGCACCCGAGAATTCCA	PAR-CLIP, 3' PCR primer, Illumina barcode is underlined
Primer 2-3'PCR	CAAGCAGAAGACGGCATACGAGATACATCGGTGACTGGAGTTCCTTGGCACCCGAGAATTCCA	PAR-CLIP, 3' PCR primer, Illumina barcode is underlined
Primer 3-3'PCR	CAAGCAGAAGACGGCATACGAGATGCCTAAGTGACTGGAGTTCCTTGGCACCCGAGAATTCCA	PAR-CLIP, 3' PCR primer, Illumina barcode is underlined
Primer 4-3'PCR	CAAGCAGAAGACGGCATACGAGATTGGTCAGTGACTGGAGTTCCTTGGCACCCGAGAATTCCA	PAR-CLIP, 3' PCR primer, Illumina barcode is underlined
Primer 1-5'PCR	AATGATACGGCGACCACCGACAGGTTCAGAGTTCTACAGTCCGA	PAR-CLIP, 5' PCR primer
DPP9-F	5’-CTGACCCGTACACACCAGG-3’	PCR for R-loops at DPP9, 5' PCR primer
DPP9_R	5’-CCCTGGCAGAGCTCTTGG-3’	PCR for R-loops at DPP9, 3' PCR primer
ACTB-F	5’-TTACCCAGAGTGCAGGTGTG-3'	PCR for R-loops at ACTB, 5' PCR primer, positive control from Skourti-Stathaki et al. 2011
ACTB-R	5’-CCCCAATAAGCAGGAACAGA-3'	PCR for R-loops at ACTB, 3' PCR primer, positive control from Skourti-Stathaki et al. 2011
BAMBI-F1	GCGCGGAGCCGGAGAGAC	PCR for R-loops at BAMBI, 5' PCR primer
BAMBI-R1	CAGCTCCCGCCCGCGCCA	PCR for R-loops at BAMBI, 3' PCR primer
BAMBI-F2-T7promoter	5’-GAATTTAATACGACTCACTATAGGGGCACCCAAAAGAAGCCCC-3'	5' primer for making BAMBI hybrids, with T7 promoter
BAMBI-R2	5’-biotin-CCCAGGAGCCCAGAAAAGTT-3’	3' primer for making BAMBI hybrids
DPP9-ssRNA	5’-rArCrCrArGrGrGrGrUrUrCrCrGrGrGrGrUrUrGrGrGrArGrCrUrGrArArCrCrArUrCrCrCrCrArCrCrUrCrArGrGrGrUrUrArUrArUrUrUrCrCrCrUrCrUrCrCrCrCrUrUrCrCrCrUrCrCrCrCrGrCrCrArArGrArGrCrUrCrUrGrCrCrArG/3’BioTEG	Oligos for making DPP9 hybrids, ssRNA, biotinylated
DPP9-ssDNA-top	5’-ACCAGGGGTTCCGGGGTTGGGAGCTGAACCATCCCCACCTCAGGGTTATATTTCCCTCTCCCCTTCCCTCCCCGCCAAGAGCTCTGCCAG/3’BioTEG	Oligos for making DPP9 hybrids, ssDNA, top strand, biotinylated
DPP9-ssDNA-bottom	5’-CTGGCA GAGCTCTTGGCGGGGAGGGAAGGGGAGAGGGAAATATAACCCTGAGGTGGGGATGGTTCAGCTCCCAACCCCGGAACCCCTGGT-3'	Oligos for making DPP9 hybrids, ssDNA, bottom strand
